# 1 Cell-free DNA Fragmentomics Assay to Discriminate the Malignancy of Breast 2 Nodules and Evaluate Treatment Response

3 Jiaqi Liu<sup>1,2,3,#</sup>, Yalun Li<sup>4,#</sup>, Wanxiangfu Tang<sup>5,#</sup>, Lijun Dai<sup>2,#</sup>, Ziqi Jia<sup>3,#</sup>, Heng Cao<sup>3</sup>, Chenghao Li<sup>2</sup>,  
4 Yuchen Liu<sup>3,6</sup>, Yansong Huang<sup>3,6</sup>, Jiang Wu<sup>3</sup>, Dongxu Ma<sup>3</sup>, Guangdong Qiao<sup>4</sup>, Hua Bao<sup>5</sup>, Shuang  
5 Chang<sup>5</sup>, Dongqin Zhu<sup>5</sup>, Shanshan Yang<sup>5</sup>, Xuxiaochen Wu<sup>5</sup>, Xue Wu<sup>5</sup>, Hengyi Xu<sup>1,6</sup>, Hongyan Chen<sup>1</sup>,  
6 Yang Shao<sup>5</sup>, Xiang Wang<sup>3,\*</sup>, Zhihua Liu<sup>1,\*</sup>, Jianzhong Su<sup>2,\*</sup>

7 <sup>1</sup>*State Key Laboratory of Molecular Oncology, National Cancer Center/National Clinical Research  
8 Center for Cancer/Cancer Hospital, Chinese Academy of Medical Sciences and Peking Union  
9 Medical College, Beijing 100021, China*

10 <sup>2</sup>*Oujiang Laboratory (Zhejiang Lab for Regenerative Medicine, Vision and Brain Health), Eye  
11 Hospital, Wenzhou Medical University, Wenzhou 325027, China*

12 <sup>3</sup>*Department of Breast Surgical Oncology, National Cancer Center/National Clinical Research  
13 Center for Cancer/Cancer Hospital, Chinese Academy of Medical Sciences and Peking Union  
14 Medical College, Beijing 100021, China*

15 <sup>4</sup>*Department of Breast Surgery, the Affiliated Yantai Yuhuangding Hospital of Qingdao University,  
16 Yantai 264000, China*

17 <sup>5</sup>*Nanjing Geneseeq Technology Inc., Nanjing 210061, China*

18 <sup>6</sup>*School of Clinical Medicine, Chinese Academy of Medical Sciences and Peking Union Medical  
19 College, Beijing 100005, China*

20 # These authors contributed equally to this article.

21 \*Corresponding authors.

22 E-mail: [sujz@wmu.edu.cn](mailto:sujz@wmu.edu.cn) (Su J); [liuzh@cicams.ac.cn](mailto:liuzh@cicams.ac.cn) (Liu Z); [xiangw@vip.sina.com](mailto:xiangw@vip.sina.com) (Wang X).

23

24 Running Title: *Liu J et al. / Detecting Breast Cancer Through cfDNA Fragmentomics*

25

26

27 **Abstract**

28 The fragmentomics-based cell-free DNA (cfDNA) assays have recently illustrated prominent abilities  
29 to identify various cancers from non-conditional healthy controls, while their accuracy for identifying  
30 early-stage cancers from benign lesions with inconclusive imaging results remains uncertain.  
31 Especially for breast cancer, current imaging-based screening methods suffer from high false-positive  
32 rates for women with breast nodules, leading to unnecessary biopsies, which add to discomfort and  
33 healthcare burden. Here, we enroll 560 female participants in this multi-center study and demonstrate  
34 that cfDNA fragmentomics is a robust non-invasive biomarker for breast cancer using whole-genome  
35 sequencing. Among the multimodal cfDNA fragmentomics profiles, the fragment size ratio (FSR),  
36 fragment size distribution (FSD), and copy number variation (CNV) show more distinguishing ability  
37 than Griffin, motif breakpoint (MBP), and neomer. The cfDNA fragmentomics (cfFrag) model using  
38 the optimal three fragmentomics features discriminated early-stage breast cancers from benign  
39 nodules, even at a low sequencing depth (3×). Notably, it demonstrated a specificity of 94.1% in  
40 asymptomatic healthy women at a 90% sensitivity for breast cancers. Moreover, we comprehensively  
41 showcase the clinical utilities of the cfFrag model in predicting patient responses to neoadjuvant  
42 chemotherapy (NAC) and in combining with multimodal features, including radiological results and  
43 cfDNA methylation features (with AUC values of 0.93 – 0.94 and 0.96, respectively).

44  
45 **Keywords:** Cell-free DNA methylation; Fragmentomics; Breast cancer; Whole-genome sequencing;  
46 Neoadjuvant chemotherapy

47

48

## 49 Introduction

50 Breast cancer is one of the most common types of cancer worldwide and accounts for the highest  
51 number of cancer-related deaths among females [1]. Early detection of breast cancer is crucial for  
52 improving patients' outcomes and survival [2]. However, current imaging-based screening  
53 methodologies, including mammography and ultrasonography, suffer from high false-positive rates,  
54 leading to many unnecessary biopsies, adding to patient discomfort [3]. Meanwhile, tumor  
55 biomarkers such as CA15-3 lack sensitivity for early-stage breast cancer [4]. Thus, liquid biopsies are  
56 needed as a non-invasive alternative or adjunct to select the high breast cancer-risk women for tumor  
57 biopsies [5].

58 Mutation-based circulating tumor DNA (ctDNA) detection has become the companion diagnostic  
59 by identifying actionable targets and alterations mediating resistance (e.g., *ESR1* and *PIK3CA*  
60 mutations in breast cancer) [6-8]. However, ctDNA typically lacks mutations, especially in  
61 early-stage disease, which limits its application in these contexts and reduces its ability to anticipate  
62 the diagnosis of localized cancer [9]. Besides, lacking common mutations in breast cancer limits the  
63 detection sensitivity in the patient-naïve approach [10]. Epigenetic analysis approaches offer potential  
64 solutions to fully exploit liquid biopsy in various settings [11, 12]. We previously conducted a  
65 whole-genome DNA methylation analysis on cell-free DNA (cfDNA) and identified ten optimal DNA  
66 methylation markers associated with breast cancer, which could enhance early detection [4]. However,  
67 current bisulfite-based methylation sequencing is prone to cfDNA damage, resulting in high cfDNA  
68 amount, depth dependencies, and increased cost.

69 Fragmentomics-based cfDNA assays have recently illustrated prominent abilities to identify  
70 various cancer types from paired non-conditional healthy controls using whole-genome sequencing  
71 (WGS) [13-17] and targeted cfDNA panels [18]. Similar to most cancer types, benign tumors also  
72 release ctDNA with unique features [19]. However, the accuracies of the cfDNA fragmentomics  
73 profile for identifying early-stage cancers from benign lesions with similar symptoms or inconclusive  
74 imaging results and predicting the therapeutic response remain largely unclear.

75 Herein, we developed a non-invasive liquid biopsy assay for early-stage breast cancer diagnosis  
76 which analyzes cfDNA fragmentomics through low-depth WGS and machine learning (**Figure 1**). To  
77 reveal its clinical utilities, we comprehensively evaluated the performances of this cfDNA  
78 fragmentomics assay in diagnosing early-stage breast cancer from benign breast nodules, predicting  
79 patient responses to neoadjuvant chemotherapy (NAC), and combining with multimodal features,

80 including standard imaging techniques and cfDNA methylation markers. This approach is particularly  
81 beneficial for female patients who have undergone unnecessary biopsies due to false positives from  
82 imaging tests on benign breast nodules. Additionally, it can offer valuable insights into neoadjuvant  
83 treatment planning for breast cancer patients. Combining a cfDNA fragmentomics assay with  
84 standard imaging techniques enhances the early detection rate of breast cancer, potentially improving  
85 breast cancer survival rates.

## 86 **Results**

### 87 **Patient characteristics in two independent cohorts**

88 We enrolled a total of 560 female participants in this multi-center study. In the training set, we  
89 enrolled 91 patients with breast cancers and 102 women with breast benign nodules from the  
90 Affiliated Yantai Yuhuangding Hospital of Qingdao University (YYH) in Yantai, China. Seven  
91 patients who refused to biopsy were excluded. In the external validation cohort, we recruited 143  
92 patients with breast cancers and 66 women with benign nodules from the Cancer Hospital of the  
93 Chinese Academy of Medical Sciences (CHCAMS) in Beijing, China. The external screening cohort  
94 recruited 119 asymptomatic healthy women from our previous cohort of non-cancer healthy  
95 volunteers in Nanjing, China (Nanjing Cohort [14]). NAC validation cohort included 9/33 (27.3%)  
96 patients with pathological complete response (pCR) and 24/33 (72.7%) patients with non-pCR from  
97 the CHCAMS. The robustness analysis cohort contained three stage-II breast cancer patients and  
98 three patients with benign nodules (**Figure 2**).

99 The breast cancer patients enrolled in the training and validation cohorts were all in the early  
100 stages (0-II), including 8.8% and 16.0% in ductal carcinoma *in situ* (DCIS)/stage 0, 36.3% and 39.9%  
101 in stage I, 54.9% and 42.0% in stage II (Table S1). Among these patients, the majority type of breast  
102 cancer (80.4% – 85.7%) was invasive ductal carcinoma (IDC), and 16.1% – 18.7% of them were  
103 identified as triple-negative breast cancer (TNBC) in both cohorts.

### 104 ***Whole-genome multi-features analysis of cell-free DNA identifies the optimizing cfDNA*** 105 ***fragmentomics profiles for breast cancer detection***

106 In the Yantai cohort (training set), an average amount of 5.6 ng cfDNA (2.3 – 26.5 ng) was  
107 extracted from 500ul plasma. In the Beijing cohorts (validation set), 2 ml plasma was used to extract  
108 cfDNA for an average amount of 8.8 ng (3.4 – 13.5 ng). We applied low-depth WGS to the cfDNA  
109 samples. Libraries were sequenced in 7.4× mean depth (2.9 – 11.3×) in the training set and 8.8× mean

110 depth (3.4 – 13.5×) in the validation set, resulting in a highly unique mapping rate and unique  
111 deduplicated mapping rate of more than 99.96%. The fragmentomics profiles were generated using  
112 low-depth WGS data from plasma cfDNA. To find optimal features for model construction, six types  
113 of fragmentomics profiles, including copy number variation (CNV), fragment size distribution (FSD),  
114 fragment size ratio (FSR), Griffin, motif breakpoint (MBP), and neomer, were generated using  
115 in-house scripts as previously reported [13, 15, 20-23]. Distinct spectrums of cfDNA fragmentomics  
116 features were found in patients with breast cancers and benign nodules, especially in CNV, FSD, and  
117 FSR (Figure S1).

118 We used the ichorCNA [15] reported tumor fraction (TF) to show the differences in CNV profile  
119 between breast cancer patients and benign nodule patients. As shown in Figure S2, the ichorCNA  
120 reported TF was significantly higher for the breast cancer patients than the benign nodule patients in  
121 both the training cohort ( $P = 8.0 \times 10^{-5}$ ) and the validation cohort ( $P = 0.029$ ). This suggests that while  
122 the breast cancer and benign groups both vary substantially from health baselines, there are still  
123 distinguishable differences between the two groups.

124 Next, base learners were constructed and optimized utilizing the machine-learning process  
125 utilizing five different algorithms of the machine-learning process [13] on the training set (Figure 1).  
126 Among the six fragmentomics features, CNV, FSD, and FSR demonstrated significantly higher area  
127 under the curve (AUC) values compared to all features (student's  $t$ -test,  $P = 1.1 \times 10^{-3}$ ,  $4.3 \times 10^{-3}$ , and  
128  $2.7 \times 10^{-2}$ , respectively; **Figure 3A**).

129 ***The cfDNA fragmentomics (cfFrag) model accurately distinguishes early-stage breast cancers***  
130 ***from benign nodules with high specificity in asymptomatic healthy women***

131 The cfDNA fragmentomics (cfFrag) scores were constructed using the optimal three  
132 fragmentomics profiles (CNV, FSR, and FSD) to predict breast cancers in the training cohort. A total  
133 of 24 ( $3 \times 8$ ) top base learners were selected to create the final cfFrag score by the 5-fold  
134 cross-validation AUC in the training cohort (Figures S3 and S4). Among the three feature types, CNV  
135 showed the highest mean AUC of 0.742 [0.661 – 0.791] for its top 8 base learners, while the FSD and  
136 FSR showed similar predict power in mean AUC (0.706 [0.631 – 0.750] and 0.706 [0.647 – 0.754];  
137 Table S2). The top-performing features for each feature type were identified by summarizing the  
138 ranking of their relative importance in each base learner, as shown in Tables S3, S4, and S5,  
139 respectively.

140 To illustrate the impact of these top-performing features on the final cfFrag model, a recursive

141 feature elimination analysis was performed. We constructed multiple cfFrag models using various  
142 subsets of top-performing features and evaluated their performances in the training and validation  
143 cohorts. The cfFrag model showed possible overfitting in the training cohort by using only subsets of  
144 top-performing features in the final model (Figure S5). The 5-fold cross-validation AUCs in the  
145 training cohort gradually decreased as more features were used in the model construction process.  
146 The fragmentomics model illustrated a solid discriminatory power between the breast cancer and  
147 benign nodules, yielding AUCs of 0.82 (95% CI: 0.76 – 0.88) and 0.81 (95% CI: 0.75 – 0.87) in  
148 training and external validation cohorts, respectively (Figure 3B).

149 The distribution patterns of the cfFrag scores showed significant differences between the benign  
150 nodule and breast cancer groups in the training cohort (Wilcoxon,  $P = 3.9 \times 10^{-14}$ ; Figure S6),  
151 suggesting the cfFrag scores were positively associated with the probability of breast cancer. A  
152 similar trend was observed in the prospective validation cohort, with the breast cancer group showing  
153 a significantly higher cfFrag score than the benign nodule group ( $P = 4.8 \times 10^{-13}$ ; Figure 3C). It  
154 achieved a specificity of 51.5% (95% CI: 38.9-64.0%) at the designed 90% sensitivity (95% CI: 83.3  
155 – 94%) in the independent validation cohort, resulting in an overall accuracy of 77.5% (95% CI: 71.2  
156 – 83.0%; **Table 1**). Setting the cut-off value at 85% sensitivity, the fragmentomics model reached  
157 specificities of 65.7% (95% CI: 55.6 – 74.8%) and 60.6% (95% CI: 47.8 – 72.4%) in the training and  
158 validation cohorts, respectively (Table S6).

159 To verify the specificity of the cfFrag score in healthy women, we analyzed the cfDNA WGS  
160 data from 119 asymptomatic healthy women to generate the cfFrag scores. As a result, it yielded an  
161 excellent specificity of 94.1% (112/119, 95% CI: 88.3 – 97.6%; Table 1 and Figure 3D) for both  
162 cut-off values for 85% and 90% sensitivities.

### 163 ***The cfDNA fragmentomics (cfFrag) model maintains excellent performances in subgroup analysis*** 164 ***and correlation with clinical features***

165 To address the potential bias brought by the imbalanced age between breast cancer and benign  
166 nodule patients, a propensity score matching analysis was performed. We selected 112 patients (64  
167 breast cancers and 48 benign nodules with matching ages) from the training cohort and 174 patients  
168 (117 breast cancers and 57 benign nodules with matching ages) from the prospective validation  
169 cohort. As a result, the fragmentomics model showed equally excellent predictive ability for breast  
170 cancer in these age-matched subsets, yielding AUCs of 0.82 (95% CI: 0.73 – 0.90) and 0.82 (95% CI:  
171 0.75 – 0.88) in the training and validation cohort, respectively (Figure S7A). Similarly, the predictive

172 model was able to maintain its predictive ability in a cohort containing small nodules (size  $\leq 1$ cm),  
173 showing a high AUC of 0.83 (95% CI: 0.72 – 0.95) in the validation cohort (Figure S7B), compared  
174 to the traditional imaging methods (AUCs = 0.64 and 0.80 for mammography and ultrasound,  
175 respectively; Figure S8).

176 A subgroup analysis focused on the model's performance was also performed to investigate  
177 potential bias. The sensitivities remained high for detecting various breast cancer subgroups,  
178 including the nodule size, stages, histology, and hormone receptor (HR) status (Figure S9). As the  
179 size of the benign nodules increased, the ability to identify different subgroups with specificity  
180 decreased (< 2cm: 54.9%, 2 – 5cm: 40.0%; Figure S10).

181 In addition to conducting subgroup analysis within the validation cohort, we performed a  
182 bootstrap analysis to minimize potential bias. Sensitivities derived from 100 bootstrap iterations for  
183 various breast cancer subgroups displayed patterns similar to our previous observations (Figure S11).  
184 Additionally, the specificities for the benign nodule subgroup, assessed through 100 bootstrap  
185 iterations, align with the trends seen in the validation cohort (Figure S12).

186 To demonstrate the performance for early detection, the cfFrag scores showed a significant  
187 gradual increase from the benign nodule to the DCIS and early-stage (stages I and II) breast cancer  
188 (ANOVA,  $P = 1.1 \times 10^{-11}$ ; Figure 3E). Although the cfFrag score distribution showed no significant  
189 difference between the HR-positive and HR-negative groups, as well as between the TNBC and  
190 non-TNBC groups, the HER2-negative group's cfFrag scores were significantly higher than the  
191 HER2-positive group (Wilcoxon,  $P = 4.1 \times 10^{-3}$ ; Figure 3F and Figure S13). This suggested the  
192 potential relation between the cfDNA fragmentomics features and the molecular subtypes.

### 193 *The cfDNA fragmentomics (cfFrag) model demonstrates robust performance in the* 194 *down-sampling process and technical replicates*

195 To decrease the potential cost and required blood samples in the future, we assessed the cfFrag  
196 model's performance using downsampled WGS data (5 – 1 $\times$ ) in the validation cohort with five  
197 technique repeats generated for each coverage depth. The fragmentomics model maintained its  
198 predictive power during the down-sampling process without showing a significant decrease in AUCs,  
199 even at a depth of 3 $\times$  ( $P > 0.05$ ; **Figure 4A**).

200 To assess the robustness of the cfFrag model within and between runs, two batches of 10ml  
201 peripheral blood samples were collected from the six patients with a median interval of five days. The  
202 plasma samples were separated into three equal proportions as technical replicates for each batch,

203 resulting in 36 samples. The model extracted and evaluated the fragmentomics profiles of these 36  
204 samples. All three fragmentomics profiles (CNV, FSR, and FSD) showed no significant differences  
205 between the technical replicates and the two batches (Figure S14). Additionally, the robustness  
206 analysis showed no significant differences between runs and within runs (Wilcoxon,  $P = 0.2 - 1.0$ ;  
207 Figure 4B).

208 ***The cfDNA fragmentomics (cfFrag) model can also predict the therapeutic pathological response***  
209 ***for breast cancer patients after neoadjuvant chemoradiotherapy***

210 To expand the clinical utility of the cfFrag model to predict the treatment response, we applied  
211 this assay to 33 female breast cancer patients receiving the NAC. The cfDNA fragmentomics profiles  
212 were generated using post-NAC plasma samples and were subsequently predicted by the cfFrag  
213 model. As a result, the cfFrag scores for pCR patients were significantly lower than the non-pCR  
214 patients (Wilcoxon,  $P = 3.6 \times 10^{-3}$ ; Figure 4C). However, it is noted that the cfFrag scores for the pCR  
215 patients were still higher than those for patients with benign nodules. Moreover, the cfFrag model  
216 demonstrated excellent performance in distinguishing between patients with pCR and with non-pCR,  
217 yielding an AUC of 0.82 (95% CI: 0.68 – 0.97; Figure 4D). This indicated that the cfFrag model has  
218 the potential to predict the therapeutic response and minimal residual disease for post-NAC breast  
219 cancer patients.

220 ***The fragmentomics and methylation of cfDNA exhibit complementarity in breast cancer detection***

221 To investigate the potential use of combined WGS with whole-genome bisulfite sequencing  
222 (WGBS) data for the differentiating power of breast cancers and benign nodules. We selected 39  
223 patients from the prospective validation cohort (including 15 breast cancers and 24 benign nodules)  
224 enrolled in a methylation-based breast cancer early detection analysis to generate the breast cancer  
225 risk score (the cfMeth score) through the WGBS [4]. We found that the cfFrag and cfMeth scores  
226 were positively correlated (Spearman's rank correlation coefficient,  $R = 0.5$ ,  $P = 1.2 \times 10^{-3}$ ; Figure 4E).  
227 Due to the limited size, leave-one-out cross-validation was performed. The combined (cfFrag +  
228 cfMeth) model showed better performance (AUC=0.96, 95% CI: 0.89 – 1.00) than the cfFrag model  
229 alone (AUC=0.88, 95% CI: 0.77 – 0.99) and the cfMeth model alone (AUC=0.86, 95% CI: 0.75 –  
230 0.98), while the addition of imaging data (cfFrag + cfMeth + Xray + Ultrasound) further improved  
231 the performance (AUC = 0.97, 95% CI: 0.92 – 1.00; Figure 4F).

232 ***The joint diagnostic model combining the cfDNA fragmentomics (cfFrag) scores and breast***  
233 ***imaging shows superior performance in detecting breast cancer***



234 To further improve the performance of the cfDNA fragmentomics-based approach  
235 cost-effectively, a joint diagnostic model was constructed by integrating the cfFrag scores and the  
236 breast imaging reporting and data system (BI-RADS) categories for mammography and ultrasound  
237 using the machine-learning process. As a result, the joint model risk score exhibited a significant  
238 difference between the breast cancer and benign nodule groups in both the training and validation  
239 cohorts (Wilcoxon,  $P < 2.2 \times 10^{-16}$ ; **Figures 5A and 5B**).

240 The joint diagnostic model showed superior performance for distinguishing breast cancers from  
241 benign nodules, with AUCs of 0.94 (95% CI: 0.90 – 0.97) and 0.93 (95% CI: 0.89 – 0.97) in the  
242 training and validation cohorts, respectively (Figure 5C), which was significantly higher than the  
243 cfFrag model alone, as well as the traditional mammography and ultrasound (all  $P < 0.05$ ; Figure  
244 S14). Furthermore, the joint model could reach a high specificity of 80.3% (95% CI: 68.7 – 89.1%) at  
245 the designed 90.2% sensitivity (95% CI: 84.1 – 94.5%) in the independent validation cohort (**Table 2**).  
246 Furthermore, the joint model maintained its performance within women with the BI-RADS 4 lesions,  
247 reaching AUCs of 0.91 (95% CI: 0.86 – 0.95) and 0.91 (95% CI: 0.86 – 0.96) in the training and  
248 validation cohorts, respectively (Figure 5D).

#### 249 ***The joint model illustrates the potential for increased early detection rates and improved survival*** 250 ***outcomes in China and the USA***

251 To assess the potential clinical benefits of the joint model in a real-world setting, we utilized an  
252 intercept model developed by Hubbell *et al* [24]. Currently, only 18% of breast cancer patients are  
253 diagnosed at stage I in China. By utilization of the joint model, the detection rate of stage-I breast  
254 cancer could be elevated to 93%. Accordingly, less breast cancer would be diagnosed at stages II-IV.  
255 Based on the stage shifts, it was estimated that the joint model could increase the 5-year survival rates  
256 of breast cancer in China by 14% (Figure 5E). Similarly, in the USA, the increased detection rate of  
257 stage-I breast cancer (95%) and the 5-year survival benefit (8%) are also estimated (Figure 5F).

## 258 **Discussion**

259 Current imaging-based breast cancer screening methods suffer from high false positives and  
260 inconclusive results among female patients with benign breast nodules, which leads to intrusive  
261 biopsy and unnecessarily adds to the discomfort. In our study, we provided a highly sensitive,  
262 non-invasive diagnostic tool for early-stage breast cancer detection through the blood-based cfDNA  
263 fragmentomics analysis, especially against control patients with radiographically

264 malignant-suspicious yet pathologically benign breast nodules. Notably, we have demonstrated a  
265 significant complementarity between cfDNA fragmentomics, traditional imaging, and cfDNA  
266 methylation features in the early detection of breast cancer and the assessment of the benign or  
267 malignant nature of breast nodules. The combination of cfDNA fragmentomics and traditional  
268 imaging findings, as well as the combination of cfDNA fragmentomics and cfDNA methylation  
269 features, can further enhance the diagnostic accuracy of breast cancer, aligning with our previous  
270 findings on combining cfDNA methylation and traditional imaging in breast cancer. The joint  
271 diagnostic model, integrating our non-invasive cfDNA fragmentomics assay with image findings,  
272 achieves high diagnostic accuracy (AUCs=0.93 – 0.94). Accordingly, the joint model can guide  
273 biopsy decisions and reduce unnecessary invasive interventions by 80.3-85.3% in patients with  
274 suspicious imaging results.

275 The detection rate/sensitivity is crucial to avoid cancer diagnostic delay. Thus, 85-90%  
276 sensitivities for early-stage breast cancer were set as the primary endpoint for the fragmentomics and  
277 joint models in this study. The fragmentomics-only and joint models performed robust detection rates  
278 in early-stage breast cancer, even in women with small nodules or inconclusive imaging results  
279 (BI-RADS 4 lesions). Due to the potential stage shift and increase in the stage-I breast cancer  
280 diagnosis rate, our joint model was estimated to save a significant number of breast cancer patients  
281 (an extra 8 – 14%) in the USA and China. However, further real-world studies are still needed to  
282 identify the cut-off value for each model with the best cost-effectiveness in different populations.

283 The detection rates were robustly elevated across increasing breast cancer stages in this study.  
284 Intriguingly, the cfDNA fragmentomics signal was more significant in patients with DCIS than those  
285 with stage-I breast cancer, which is consistent with our methylation-based cfDNA analysis [4] but  
286 inconsistent with previous mutation-based cfDNA analysis [25]. It indicates the advantages of  
287 epigenetic-based and fragmentomics-based cfDNA analysis in the early detection of DCIS/stage-0  
288 breast cancer. In addition, the cfFrag model has shown sufficient specificity in asymptomatic healthy  
289 women, further indicating the potential clinical utility of the cfFrag model in population-based breast  
290 cancer screening.

291 The use of peripheral cfDNA has gained prominence in early cancer detection, as  
292 methylation-based and fragment-based cfDNA markers have demonstrated effectiveness in detecting  
293 many cancer types [4, 13-15, 26]. Methylation features in cfDNA are related to the cancer  
294 tissue-of-origin, while cfDNA fragmentomics features are linked to the abnormal DNA nuclease

295 activities in cancers [27]. Compared to the methylation-based cfDNA approach, fragment-based  
296 cfDNA assays offer advantages such as lower cost by avoiding sodium bisulfite treatment and  
297 requiring less blood sample volume because of low sequence depth. Interestingly, our combined  
298 analysis of cfDNA methylation and fragmentomics reveals that combining the fragmentomics (cfFrag  
299 score) and the methylation markers (cfMeth score) could achieve superior performance than each  
300 marker separately, which was in agreement with the result of the recent sub-study in the Circulating  
301 Cell-free Genome Atlas [28].

302 Monitoring treatment response is crucial to deciding the subsequent treatment strategies for  
303 breast cancer patients receiving NAC, but this was unmet using the current methods [29]. Recently,  
304 mutation-based and methylation-based ctDNA detection approaches have been demonstrated to  
305 predict the treatment response and residual disease in post-NAC breast cancer patients [30, 31]. Our  
306 study suggests that the features of cfDNA fragmentomics could be used as an alternative approach to  
307 evaluate the treatment response in breast cancer patients.

## 308 **Limitations**

309 Firstly, the sample size of the combining analysis of the cfDNA fragmentomics and methylation  
310 is relatively small. Multi-omics cfDNA analysis with large sample sizes is still needed to identify the  
311 optimal non-invasive combination with low cost using a trace amount of blood sample for the early  
312 detection of breast cancer. Secondly, similar to most previous cfDNA fragmentomics studies that only  
313 focused on one cancer type [13-15], we also aimed to identify the breast cancer-specific cfDNA  
314 fragmentomics features in this study. With the identification of the cfDNA fragmentomics spectrum in  
315 different cancer types in the future, it would be cost-effective to develop a pan-cancer diagnostic  
316 model to detect multiple types of cancer and indicate the cancer origin.

## 317 **Conclusions**

318 This pilot study systematically evaluates performance in applying cfDNA fragmentomics as a  
319 non-invasive biomarker for breast cancer. The low-depth cfDNA fragmentomics profiling with  
320 automated machine learning demonstrated excellent and robust performance in distinguishing  
321 early-stage breast cancers from benign nodules with inconclusive imaging results, the predictive  
322 value of NAC response, and sufficient specificity in asymptomatic healthy women in a multi-center  
323 prospective setting. The combination of non-invasive cfDNA fragmentomics features and standard

324 diagnostic imaging improved the rate of accurate detection of early breast cancer. This approach  
325 holds promise for improving clinical outcomes and streamlining healthcare practices.

## 326 **Materials and methods**

### 327 *Study Design and Participants*

328 In this multi-center study, we recruited female patients independently in three centers in China.  
329 The training set enrolled 200 consecutive female patients with malignant-suspicious breast imaging  
330 results from the YYH in Yantai. The external independent validation sets, referred to as Beijing  
331 cohorts, prospectively enrolled 209 consecutive female patients who underwent breast lesion biopsy,  
332 33 female breast cancer patients after NAC, and six female patients with repeating samples for  
333 robustness analysis from the CHCAMS in Beijing. The external screening cohort recruited 119  
334 asymptomatic healthy women from our previous Nanjing cohort [14]. The recruitment period was  
335 from January 1, 2019, to August 1, 2022. This study adhered to the guidelines of the STARD  
336 (Standards for Reporting of Diagnostic Accuracy Studies).

### 337 *Sample Collection and Clinical Evaluation*

338 We collected 10 ml of peripheral blood samples from each participant before biopsy or surgery.  
339 In the Yantai cohort (training set), the collected blood samples were kept in EDTA blood collection  
340 tubes (Becton Dickinson, CA) at a temperature of 4°C and underwent centrifugations (1,800 g for 10  
341 minutes and 16,000 g for 10 minutes both at 4°C) within 2 hours. In the Beijing cohorts (independent  
342 validation set), the collected blood samples were kept in the CELL-FREE DNA BCT® blood  
343 collection tubes (Streck, NE) at room temperature (RT, 15 – 25°C). Plasma was extracted within 48  
344 hours following blood collection by centrifugations of the blood according to the protocols in the  
345 training set.

346 Standard mammography and ultrasonography techniques were conducted at two centers and  
347 independently interpreted according to the BI-RADS standard. Patients with suspicious breast  
348 imaging results underwent surgical or core needle biopsies. The pathological examination of tissue  
349 specimens confirmed the malignant or benign status of each participant. Women with negative  
350 imaging or biopsy results were excluded from having breast cancer after a 6-month follow-up. The  
351 molecular subtype of each lesion was determined according to the pathologic criteria for HR  
352 (including estrogen receptor and progesterone receptor) and human epidermal growth factor receptor  
353 2 (HER2) [32].

### 354 ***Library preparation and whole genome sequencing***

355 For the cfDNA extraction, we used the liquid handling platform (Hamilton Microlab STAR,  
356 Hamilton Company, NV) and the QIAamp Circulating Nucleic Acid Kit (Qiagen, Germany)  
357 according to previously reported protocols [13]. The Qubit dsDNA HS Assay Kit (Thermo Fisher  
358 Scientific, MA) was then utilized for measuring the extracted cfDNA's concentration. The PCR-free  
359 WGS library was automatically constructed on Biomek (Beckman Coulter, UK), using 5-10 ng of  
360 cfDNA sample and the KAPA Hyper Prep Kit (KAPA Biosystems, MA). The constructed library was  
361 quantified by the KAPA SYBR FAST qPCR Master Mix (KAPA Biosystems, MA) before paired-end  
362 sequencing on NovaSeq platforms (Illumina, CA).

363 For the quality control of bioinformatics analysis, Trimmomatic [33] was used to trim the raw  
364 sequencing data. The removal of PCR duplicates was performed by the Picard toolkit  
365 (<http://broadinstitute.github.io/picard/>). The high-quality reads were then mapped to the human  
366 reference genome (GRCh37/UCSC hg19) using BWA sequence aligner [34].

### 367 ***Fragmentomics profiling***

368 As tumor cell fragments are shorter than those from normal cells [35], the FSR profile analyzes  
369 the ratio of short fragments in the human genome. Short fragments are defined as 100 – 150bp and  
370 long fragments are defined as 151 – 220bp [13, 15, 20]. The human genomes were divided into 5Mb  
371 bins, in which the ratios of short to long fragments were calculated, resulting in a total of 1,082 (541  
372 bins × 2) FSR features. The FSD profile focused on the detailed length patterns of cfDNA fragments,  
373 categorizing these fragments based on increments of 5bp in the range of 100bp to 220bp [13, 36]. The  
374 proportion of fragments in each bin was computed on the human chromosome arm level for human  
375 autosomes, resulting in 936 FSD features that machine learning algorithms can employ. The CNV  
376 profile was calculated using ichorCNA [15]. For each sample, the genome was divided into 1Mb bins.  
377 The depth for each bin was then compared to the default baseline using the Hidden Markov Model  
378 (HMM). The log<sub>2</sub> ratio for each bin was calculated, generating 2475 features. The profiling of Griffin,  
379 neomer, and MBP was present in **Supplementary methods** (File S1).

### 380 ***cfFrag Model construction and validation***

381 A machine-learning process that utilizes five different algorithms, including the random forest,  
382 the generalized linear model, the deep learning, the gradient boosting machine, and the eXtreme  
383 gradient boosting [13], was employed to generate optimal base learners. A breast cancer prediction  
384 model, namely the cfFrag scores, was developed using the mean value of top base learners ranked by

385 the AUC of the 5-fold cross-validation for the optimal three fragmentomics profiles in the training  
386 cohort (Yantai cohort; File S1).

387 The machine-learning process was also utilized to develop a joint diagnostic model for the  
388 training cohort, which adopts the cfFrag scores and the BI-RADS categories of mammography and  
389 ultrasound. A similar automated machine-learning process was used to construct the joint diagnostic  
390 model by using the cfFrag scores as numeric features and the BI-RADS by mammography and  
391 ultrasound as categorical features. The process utilized a randomized search for automatic algorithm  
392 selection and hyperparameter tuning. The best-performing model was selected from a total of 200  
393 trained models based on the highest AUC using the training cohort via a 5-fold cross-validation  
394 approach. Cut-off values were determined using a 5-fold cross-validation to predict the score of the  
395 training cohort to reach 85% and 90% sensitivities. The external independent validation cohorts  
396 evaluated the joint diagnostic models' performance. In addition, to expand the clinical utility of the  
397 cfFrag model, its performance was further evaluated in the NAC cohort.

### 398 ***Statistical Analysis***

399 The receiver operating characteristic (ROC) curves were generated by the pROC package  
400 (version 1.17.0.1) [37]. The sensitivity, specificity, and accuracy with the corresponding 95%  
401 confidence intervals (CI) were calculated by the epiR package (version 2.0.19) [38]. Propensity score  
402 matching analysis used the MatchIt package (version 4.2.0) [39]. All statistical analyses, including  
403 student's *t*-test, Wilcoxon, and ANOVA, were performed in R (version 3.6.3) [40].

### 404 **Ethical statement**

405 This study was reviewed and approved by the ethics committees of each center (22/291-3493 for  
406 the CHACMS and 2020-289 for the YYH). Each participant provided written informed consent.

### 407 **Data and code availability**

408 Raw data from the deidentified participant and analytic code generated in this study are available  
409 for non-commercial use upon reasonable request to Dr. Jiaqi Liu ([j.liu@cicams.ac.cn](mailto:j.liu@cicams.ac.cn)).

### 411 **Competing interests**

412 Drs Tang, Bao, Chang, Zhu, Yang, Xuxiaochen Wu, Xue Wu, and Shao are employees of Nanjing

413 Geneseq Technology Inc. All the other authors have no conflict of interest to declare. All the  
414 authors have read and approved the final manuscript for publication.

## 415 **Acknowledgments**

416 This research was funded in part by the National Natural Science Foundation of China (82272938  
417 to Jiaqi Liu), the Beijing Nova Program (20220484059 to Jiaqi Liu), and the CAMS Innovation  
418 Fund for Medical Sciences (2021-I2M-1-014 to Jiaqi Liu). This study is part of the DETect study  
419 (Deciphering Epigenetic signatures in Tumor and Exploiting ctDNA). We thank all the individuals  
420 involved in the study for their participation.

## 421 **References**

- 422 [1] Pace LE, Keating NL. A systematic assessment of benefits and risks to guide breast cancer  
423 screening decisions. *JAMA* 2014;311:1327-35.
- 424 [2] Giaquinto AN, Sung H, Miller KD, Kramer JL, Newman LA, Minihan A, et al. Breast cancer  
425 statistics, 2022. *CA Cancer J Clin* 2022;72:524-41.
- 426 [3] Bevers TB, Helvie M, Bonaccio E, Calhoun KE, Daly MB, Farrar WB, et al. Breast cancer  
427 screening and diagnosis, Version 3.2018, NCCN clinical practice guidelines in oncology. *J Natl*  
428 *Compr Canc Netw* 2018;16:1362-89.
- 429 [4] Liu J, Zhao H, Huang Y, Xu S, Zhou Y, Zhang W, et al. Genome-wide cell-free DNA methylation  
430 analyses improve accuracy of non-invasive diagnostic imaging for early-stage breast cancer.  
431 *Mol Cancer* 2021;20:36.
- 432 [5] Corcoran RB, Chabner BA. Application of cell-free DNA analysis to cancer treatment. *N Engl J*  
433 *Med* 2018;379:1754-65.
- 434 [6] Bidard FC, Hardy-Bessard AC, Dalenc F, Bachelot T, Pierga JY, de la Motte Rouge T, et al.  
435 Switch to fulvestrant and palbociclib versus no switch in advanced breast cancer with rising  
436 ESR1 mutation during aromatase inhibitor and palbociclib therapy (PADA-1): a randomised,  
437 open-label, multicentre, phase 3 trial. *Lancet Oncol* 2022;23:1367-77.
- 438 [7] Henry NL, Somerfield MR, Dayao Z, Elias A, Kalinsky K, McShane LM, et al. Biomarkers for  
439 systemic therapy in metastatic breast cancer: ASCO guideline update. *J Clin Oncol*  
440 2022;40:3205-21.
- 441 [8] Liu J, Huang Y, Wang X. Mutation-based circulating tumor DNA detection approach for  
442 monitoring the therapy response in breast cancer. *J Natl Cancer Cent* 2023;3(4):254-5.
- 443 [9] Alix-Panabières C, Pantel K. Liquid biopsy: From discovery to clinical application. *Cancer*  
444 *Discov* 2021;11:858-73.
- 445 [10] Cohen JD, Li L, Wang Y, Thoburn C, Afsari B, Danilova L, et al. Detection and localization of  
446 surgically resectable cancers with a multi-analyte blood test. *Science* 2018;359:926-30.

- 447 [11] Gianni C, Palleschi M, Merloni F, Di Menna G, Sirico M, Sarti S, et al. Cell-free DNA  
448 fragmentomics: A promising biomarker for diagnosis, prognosis and prediction of response in  
449 breast cancer. *Int J Mol Sci* 2022;23(22):14197.
- 450 [12] Wu SL, Zhang X, Chang M, Huang C, Qian J, Li Q, et al. Genome-wide  
451 5-hydroxymethylcytosine profiling analysis identifies MAP7D1 as a novel regulator of lymph  
452 node metastasis in breast cancer. *Genomics Proteomics Bioinformatics* 2021;19:64–79.
- 453 [13] Bao H, Wang Z, Ma X, Guo W, Zhang X, Tang W, et al. Letter to the Editor: An ultra-sensitive  
454 assay using cell-free DNA fragmentomics for multi-cancer early detection. *Mol Cancer*  
455 2022;21:129.
- 456 [14] Wang S, Meng F, Li M, Bao H, Chen X, Zhu M, et al. Multidimensional cell-free DNA  
457 fragmentomic assay for detection of early-stage lung cancer. *Am J Respir Crit Care Med*  
458 2023;207:1203-13.
- 459 [15] Ma X, Chen Y, Tang W, Bao H, Mo S, Liu R, et al. Multi-dimensional fragmentomic assay for  
460 ultrasensitive early detection of colorectal advanced adenoma and adenocarcinoma. *J Hematol*  
461 *Oncol* 2021;14:175.
- 462 [16] Moldovan N, van der Pol Y, van den Ende T, Boers D, Verkuijlen S, Creemers A, et al.  
463 Multi-modal cell-free DNA genomic and fragmentomic patterns enhance cancer survival and  
464 recurrence analysis. *Cell Rep Med* 2024;5:101349.
- 465 [17] Liu D, Yehia L, Dhawan A, Ni Y, Eng C. Cell-free DNA fragmentomics and second malignant  
466 neoplasm risk in patients with PTEN hamartoma tumor syndrome. *Cell Rep Med*  
467 2024;5:101384.
- 468 [18] Helzer KT, Sharifi M, Sperger JM, Shi Y, Annala M, Bootsma ML, et al. Fragmentomic analysis  
469 of circulating tumor DNA targeted cancer panels. *Ann Oncol* 2023;34(9):813-25.
- 470 [19] Wu N, Zhang Z, Zhou X, Zhao H, Ming Y, Wu X, et al. Mutational landscape and genetic  
471 signatures of cell-free DNA in tumour-induced osteomalacia. *J Cell Mol Med* 2020;24:4931-43.
- 472 [20] Cristiano S, Leal A, Phallen J, Fiksel J, Adleff V, Bruhm DC, et al. Genome-wide cell-free DNA  
473 fragmentation in patients with cancer. *Nature* 2019;570:385-9.
- 474 [21] Georgakopoulos-Soares I, Barnea OY, Mouratidis I, Bradley R, Easterlin R, Chan C, et al.  
475 Leveraging sequences missing from the human genome to diagnose cancer. *medRxiv*  
476 2021:2021.08.15.21261805.
- 477 [22] Doebley AL, Ko M, Liao H, Cruikshank AE, Santos K, Kikawa C, et al. A framework for clinical  
478 cancer subtyping from nucleosome profiling of cell-free DNA. *Nat Commun* 2022;13:7475.
- 479 [23] Guo W, Chen X, Liu R, Liang N, Ma Q, Bao H, et al. Sensitive detection of stage I lung  
480 adenocarcinoma using plasma cell-free DNA breakpoint motif profiling. *EBioMedicine*  
481 2022;81:104131.
- 482 [24] Hubbell E, Clarke CA, Aravanis AM, Berg CD. Modeled reductions in late-stage cancer with a  
483 multi-cancer early detection test. *Cancer Epidemiol Biomarkers Prev* 2021;30:460-8.
- 484 [25] Chin YM, Takahashi Y, Chan HT, Otaki M, Fujishima M, Shibayama T, et al. Ultradeep targeted  
485 sequencing of circulating tumor DNA in plasma of early and advanced breast cancer. *Cancer*  
486 *Sci* 2021;112:454-64.



- 487 [26] Xu RH, Wei W, Krawczyk M, Wang W, Luo H, Flagg K, et al. Circulating tumour DNA  
488 methylation markers for diagnosis and prognosis of hepatocellular carcinoma. *Nat Mater*  
489 2017;16:1155-61.
- 490 [27] Zhou Z, Ma ML, Chan RWY, Lam WKJ, Peng W, Gai W, et al. Fragmentation landscape of  
491 cell-free DNA revealed by deconvolutional analysis of end motifs. *Proc Natl Acad Sci U S A*  
492 2023;120:e2220982120.
- 493 [28] Jamshidi A, Liu MC, Klein EA, Venn O, Hubbell E, Beausang JF, et al. Evaluation of cell-free  
494 DNA approaches for multi-cancer early detection. *Cancer Cell* 2022;40:1537-49.e12.
- 495 [29] Graeser M, Schradang S, Gluz O, Strobel K, Würstlein R, Kümmel S, et al. Early response by  
496 MR imaging and ultrasound as predictor of pathologic complete response to 12-week  
497 neoadjuvant therapy for different early breast cancer subtypes: Combined analysis from the  
498 WSG ADAPT subtrials. *Int J Cancer* 2021;148:2614-27.
- 499 [30] Magbanua MJM, Brown Swigart L, Ahmed Z, Sayaman RW, Renner D, Kalashnikova E, et al.  
500 Clinical significance and biology of circulating tumor DNA in high-risk early-stage  
501 HER2-negative breast cancer receiving neoadjuvant chemotherapy. *Cancer Cell*  
502 2023;41:1091-102.e4.
- 503 [31] Moss J, Zick A, Grinshpun A, Carmon E, Maoz M, Ochana BL, et al. Circulating breast-derived  
504 DNA allows universal detection and monitoring of localized breast cancer. *Ann Oncol*  
505 2020;31:395-403.
- 506 [32] Waks AG, Winer EP. Breast cancer treatment: A review. *JAMA* 2019;321:288-300.
- 507 [33] Bolger AM, Lohse M, Usadel B. Trimmomatic: a flexible trimmer for Illumina sequence data.  
508 *Bioinformatics* 2014;30:2114-20.
- 509 [34] Li H, Durbin R. Fast and accurate short read alignment with Burrows-Wheeler transform.  
510 *Bioinformatics* 2009;25:1754-60.
- 511 [35] Jiang P, Chan CW, Chan KC, Cheng SH, Wong J, Wong VW, et al. Lengthening and shortening  
512 of plasma DNA in hepatocellular carcinoma patients. *Proc Natl Acad Sci U S A*  
513 2015;112:E1317-25.
- 514 [36] Zhang X, Wang Z, Tang W, Wang X, Liu R, Bao H, et al. Ultrasensitive and affordable assay for  
515 early detection of primary liver cancer using plasma cell-free DNA fragmentomics. *Hepatology*  
516 2022;76(2):317-329.
- 517 [37] Robin X, Turck N, Hainard A, Tiberti N, Lisacek F, Sanchez JC, et al. pROC: an open-source  
518 package for R and S+ to analyze and compare ROC curves. *BMC Bioinformatics* 2011;12:77.
- 519 [38] Stevenson M, Nunes T, Sanchez J, Thornton R, Reiczigel J, Robison-Cox J, et al. EpiR: An R  
520 package for the analysis of epidemiological data. 2013; 9–43. Available online:  
521 <https://cran.r-universe.dev/epiR> (accessed on 1 Oct 2022).
- 522 [39] Ho D, Imai K, King G, Stuart EA. MatchIt: Nonparametric preprocessing for parametric causal  
523 inference. *J Stat Softw.* 2011;42:1-28.
- 524 [40] R Core Team. R: A Language and Environment for Statistical Computing. 2021. Available online:  
525 <https://www.R-project.org/> (accessed on 1 Oct 2022).

526

527

528

529

## Figure legends

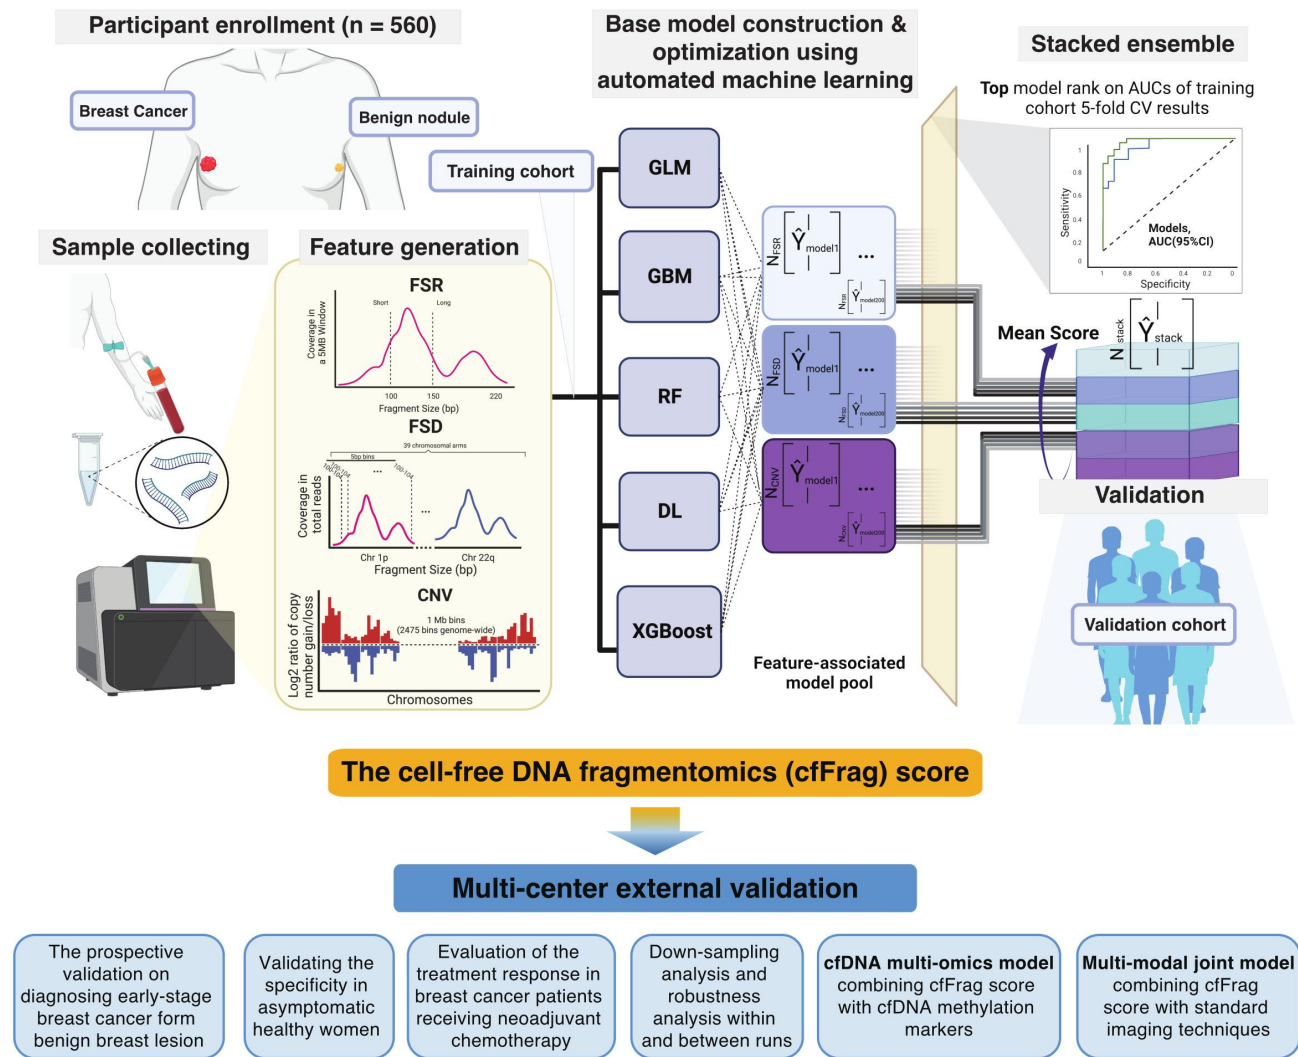

530  
531

### Figure 1. Study Design.

532 Plasma samples collected from patients with breast cancers or benign nodules were used to extract  
 533 cfDNA. WGS was performed on the cfDNA to generate fragmentomics feature types. The  
 534 fragmentomics machine learning model was constructed using the optimal three fragmentomics  
 535 profiles in the training set, including FSR, FSD, and CNV. Five different algorithms were utilized in  
 536 the automatic machine-learning process. For each feature type, the top three models with the

537 highest AUCs of 5-fold cross-validation in the training cohort were selected, and the mean cancer  
538 score (the cfFrag score) was used for the fragmentomics model. The cfFrag model was developed in  
539 the training cohort and evaluated in the validation cohorts. Abbreviation: cfDNA, cell-free DNA;  
540 WGS, whole-genome sequencing; FSR, fragment size ratio; FSD, fragment size distribution; CNV,  
541 copy number variation; GLM, generalized linear model; GBM, gradient boosting machine; RF,  
542 random forest; DL, deep learning; XGBoost, eXtreme gradient boosting; AUC, area under the  
543 curve; CV, cross-validation.

544

545

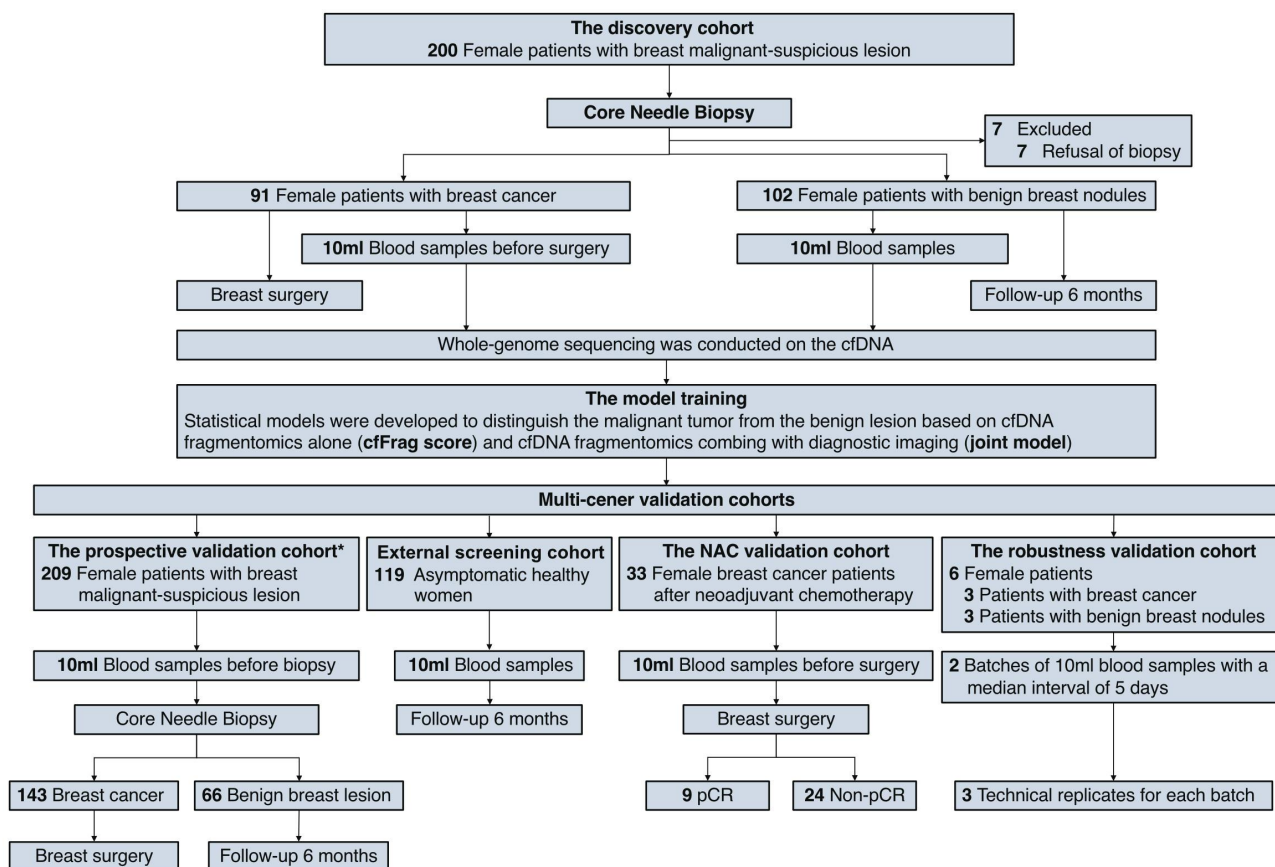

546

547 **Figure 2. Patient Enrollment.**

548 In this multi-center study, we recruited 200 consecutive female patients with malignant-suspicious  
 549 breast imaging results from the Yantai cohort as the training set. As a result, 91 patients with breast  
 550 cancer and 102 women with benign breast nodules were enrolled, and seven patients who refused to  
 551 biopsy were excluded. The external validation cohorts were composed of a screening cohort of  
 552 healthy women in Nanjing (N = 119) and three independent validation cohorts in Beijing, namely  
 553 the prospective validation cohort (N = 209), the neoadjuvant chemotherapy validation cohort (N =  
 554 33), and the robustness analysis cohort (N = 6). \*The prospective validation cohort included 39  
 555 participants (14 with breast cancer and 25 with benign nodules) enrolled in a methylation-based  
 556 early detection analysis for breast cancer through whole-genome bisulfite sequencing [4].  
 557 Abbreviation: NAC, neoadjuvant chemotherapy; pCR, pathological complete response.

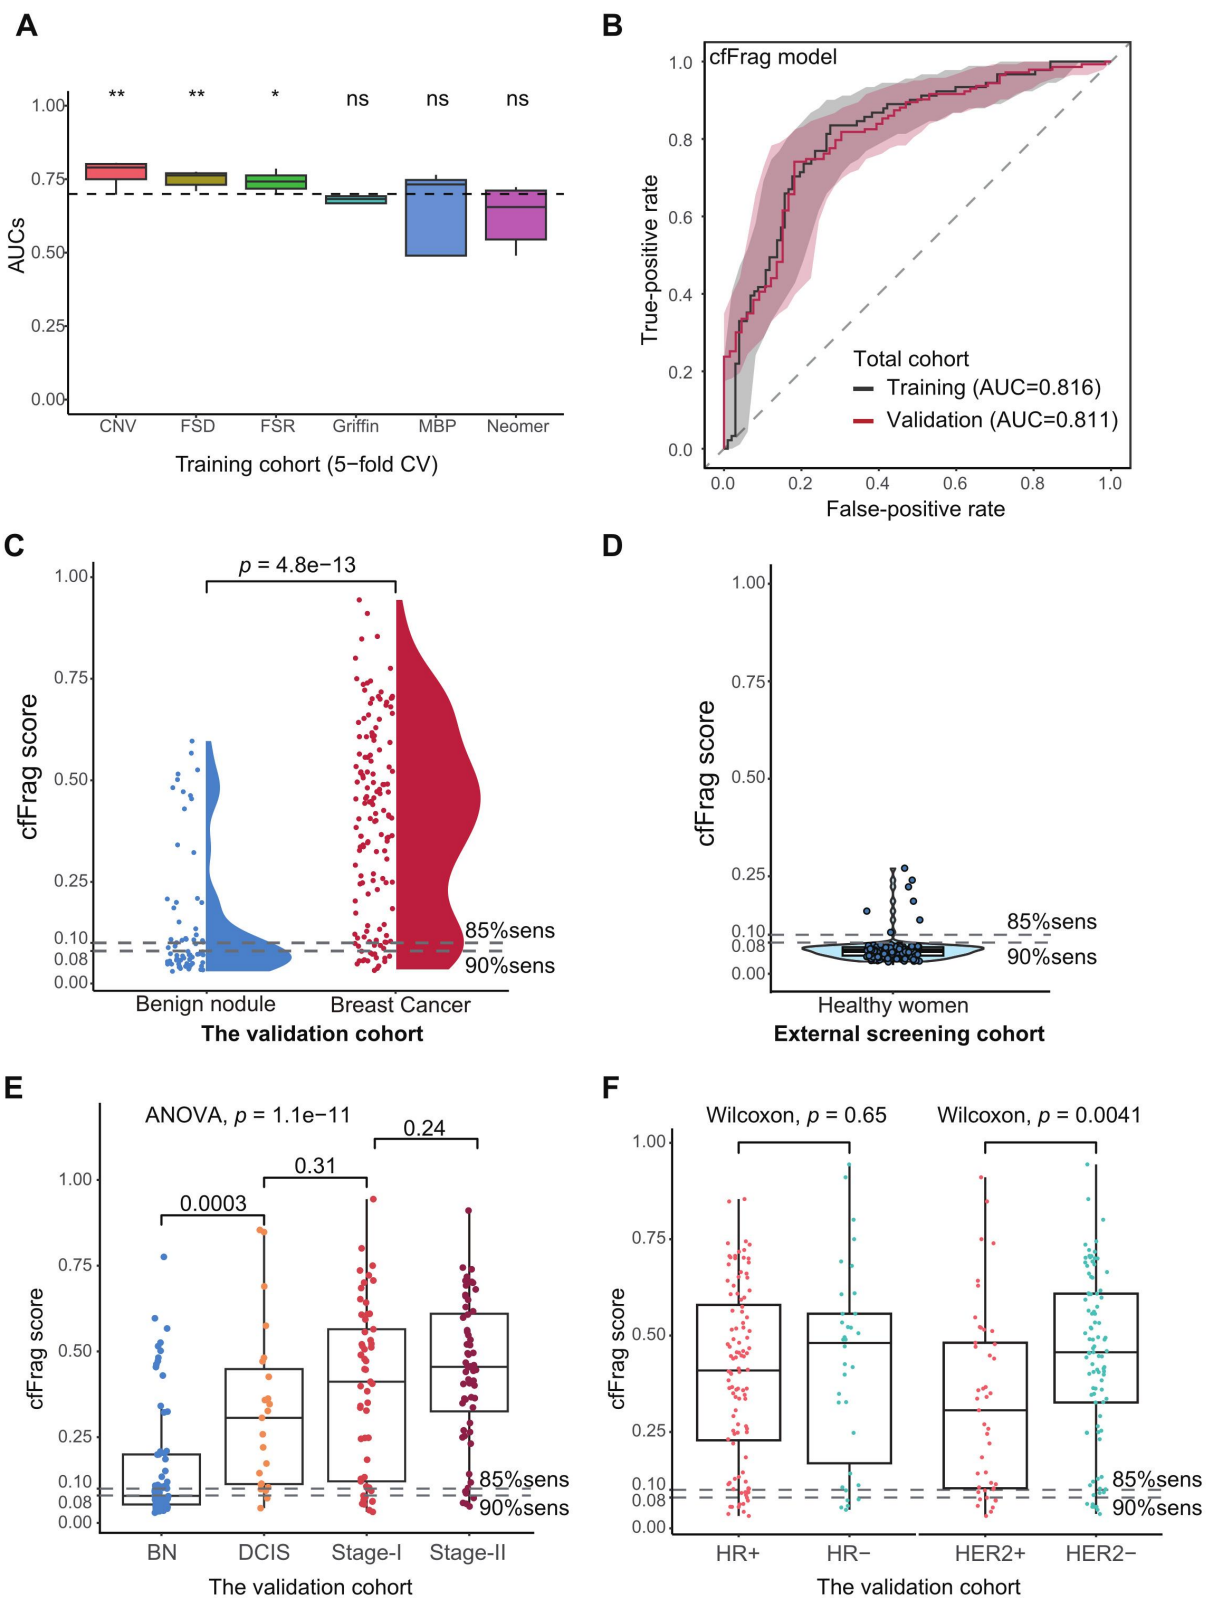

559 **Figure 3. Evaluation of the cfDNA Fragmentomics (cfFrag) Model.**

560 **A.** Boxplots for AUCs of top base learners for six different cfDNA fragmentomics features. The  
561 t-test *P* values are 0.0011, 0.0043, 0.027, 0.17, 0.34, and 0.086 for these features, respectively. **B.**  
562 ROC curves using the training cohort (5-fold cross-validation) and the independent validation  
563 cohort. **C.** Violin plot illustrating cfFrag score distribution in the independent validation cohort's  
564 benign nodule and breast cancer groups. The cutoffs, shown as the dotted lines, were determined by  
565 the training cohort. **D.** Violin plot using cfFrag cancer risk scores in 119 healthy female volunteers  
566 from our previous study [13]. The cfFrag scores for most healthy women (112/119) were lower than  
567 both cut-off values, yielding an excellent specificity of 94.1%. **E.** The box plot illustrating cfFrag  
568 score distribution in the benign nodule group and very early (DCIS), and early-stage (stages I and II)  
569 breast cancer groups. **F.** The box plot illustrating the cfFrag score distribution of different subgroups  
570 in the validation cohort. Abbreviation: CNV, copy number variation. FSD, fragment size  
571 distribution. FSR, fragment size ratio. MBP, motif breakpoint; AUC, area under the curve; CV,  
572 cross-validation; ns, not significant; sens, sensitivity; BN, benign nodule; ROC, receiver operating  
573 characteristic; DCIS, ductal carcinoma *in situ*; HR, hormone receptor; HER2, human epidermal  
574 growth factor receptor 2.

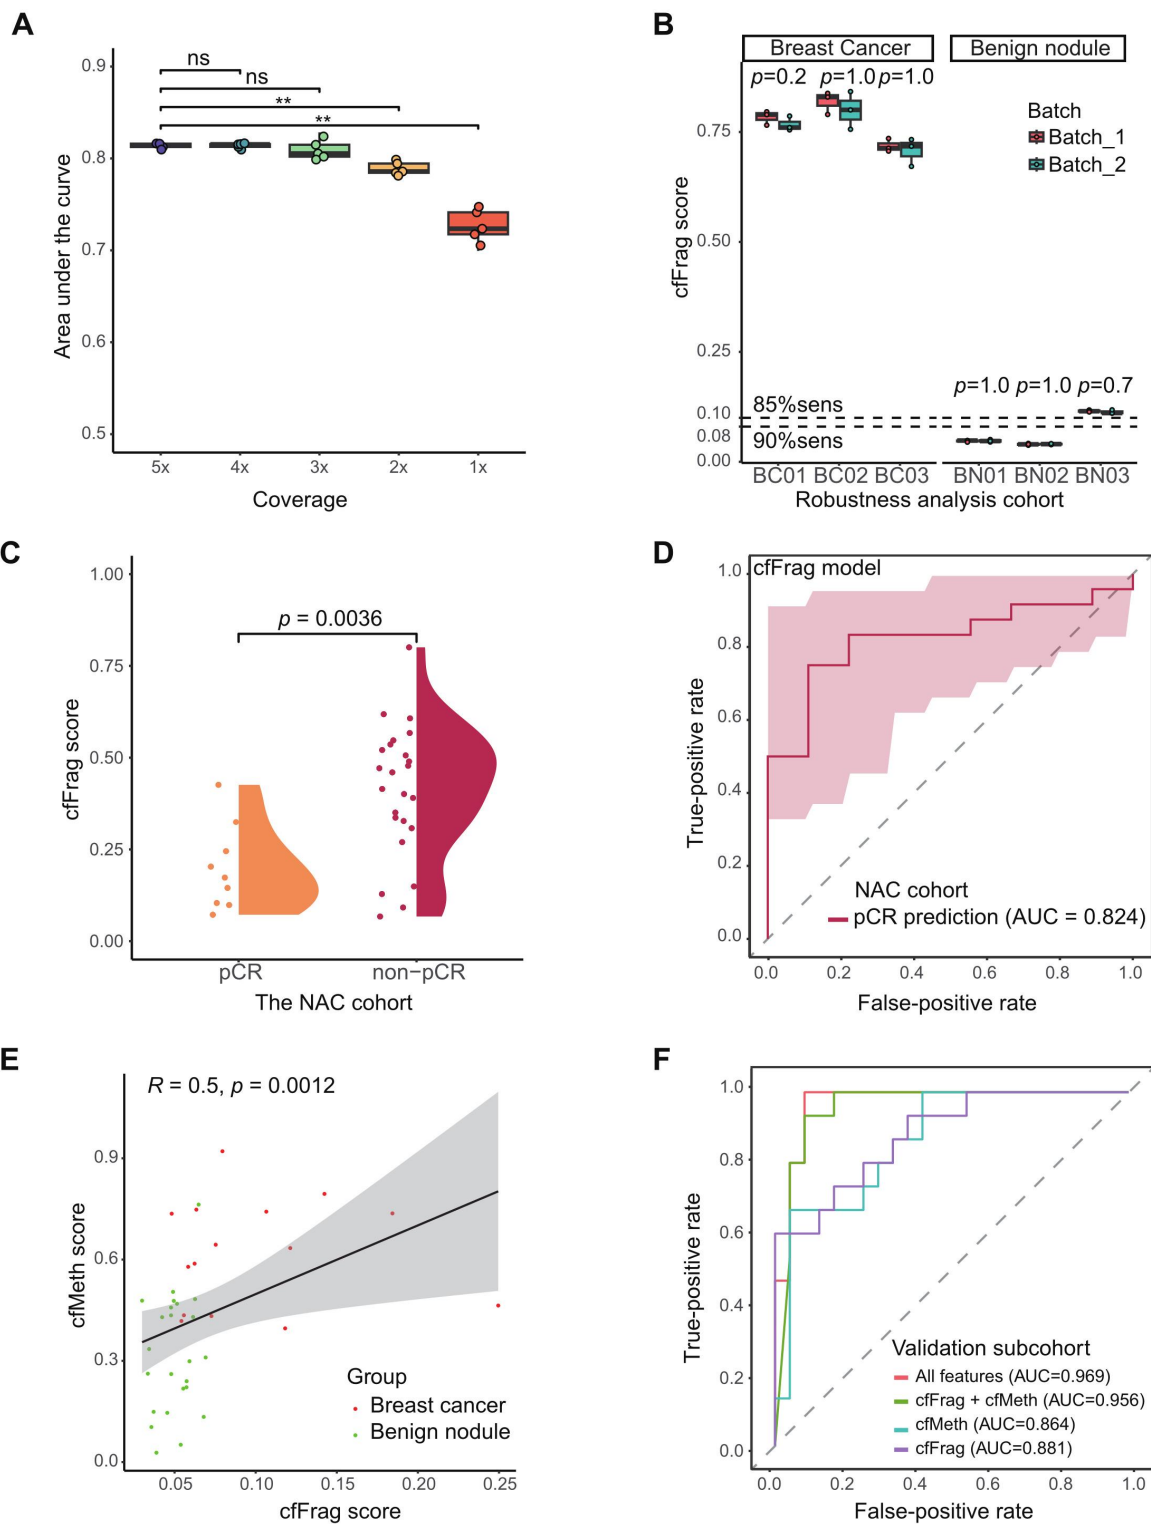



576 **Figure 4. Comprehensively Evaluating cfFrag Model Using Additional Cohorts.**

577 **A.** Box plot for the validation cohorts' AUCs for the down-sampling process ( $5\times$  to  $1\times$ ). There is no  
578 significant performance drop till  $3\times$  coverage (ns, no significance; \*\*  $P < 0.01$ ). **B.** Box plot for  
579 cfFrag scores in external test cohort containing 3 breast cancer patients and 3 benign nodule  
580 patients. For each patient, two batches  $\times$  three repeats were performed. **C.** ROC curve for  
581 distinguishing patients with pathological complete response ( $N = 9$ ) from patients without  
582 pathological complete response ( $N = 24$ ) in a neoadjuvant therapy cohort. **D.** Violin plot using  
583 cfFrag cancer risk scores in patients with pCR and non-pCR. **E.** Scatter plot showing the correlation  
584 between cfMeth scores and cfFrag scores for a subset of patients in the validation cohort ( $N = 39$ )  
585 with previously reported whole-genome bisulfite sequencing data [4]. **F.** ROC curves for a subset of  
586 patients in the validation cohort ( $N = 39$ ) with previously reported whole-genome bisulfite  
587 sequencing data [4] and imaging data using leave-one-out cross-validation. BC, breast cancer; BN,  
588 benign nodule; sens, sensitivity; NAC, neoadjuvant chemotherapy; pCR, pathological complete  
589 response; AUC, area under the curve.

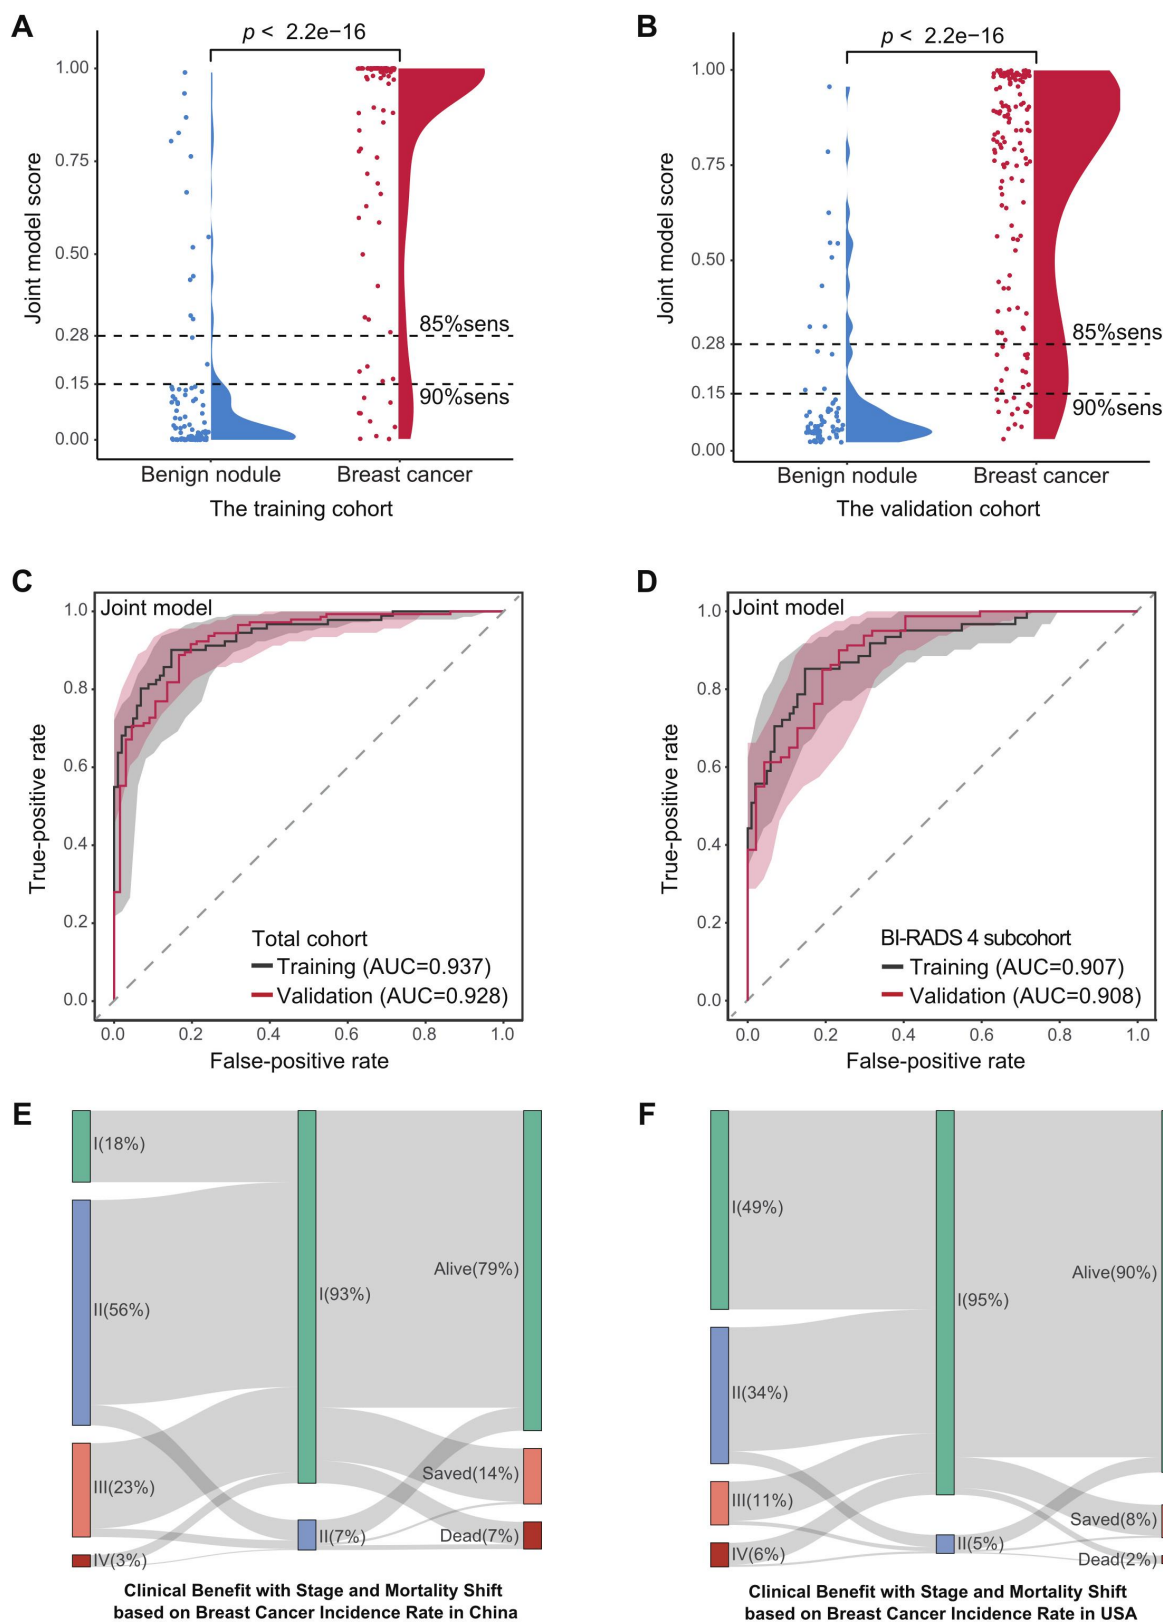

591 **Figure 5. Evaluating Performance for Joint Model Using Both Fragmentomics and Imaging**  
 592 **Techniques.**

593 **A.** Violin plots illustrating cancer score distribution of the joint model in the benign nodule and  
 594 breast cancer groups in the training cohort. **B.** The score distribution of the joint model in the  
 595 benign nodule and breast cancer groups in the independent validation cohort. **C.** ROC curves using  
 596 the training cohort (5-fold cross-validation) and the independent validation cohort. **D.** ROC curves  
 597 for subset patients with BI-RADS category 4 in the training cohort (5-fold cross-validation) and the  
 598 validation cohort. **E.** Potential clinical benefit evaluation using breast cancer statistics in China. **F.**  
 599 Potential clinical benefit of the joint model in the USA. The left bars show the current stage  
 600 distributions of newly diagnosed breast cancer, and the middle bars indicate the stage distributions  
 601 for potential clinical utilization of the joint model in the two countries. Accordingly, mortality shifts  
 602 and 5-year survival benefits (orange bars) achieved by using the joint model are shown in the right  
 603 bars. Abbreviation: sens, sensitivity; BI-RADS, breast imaging reporting and data system.

604  
 605 **Table 1. Evaluating the cfFrag Model Performances in the Training and Validation Cohorts.**

|                            | <b>Training cohort<br/>(5-fold cross-validation)</b> | <b>Prospective validation<br/>cohort</b> | <b>Asymptomatic<br/>healthy women</b> |
|----------------------------|------------------------------------------------------|------------------------------------------|---------------------------------------|
| Breast cancer patients (n) | 91                                                   | 143                                      | -                                     |
| Benign nodule patients (n) | 102                                                  | 66                                       | -                                     |
| Healthy controls (n)       | -                                                    | -                                        | 119                                   |
| Sensitivity (95% CI)       | 90.1% (82.1-95.4%)                                   | 89.5% (83.3-94%)                         | -                                     |
| Specificity (95% CI)       | 52.0% (41.8-62.0%)                                   | 51.5% (38.9-64%)                         | 94.1% (88.3-97.6%)                    |
| PPV (95% CI)               | 62.6% (53.7-70.9%)                                   | 80.0% (73.0-85.9%)                       | -                                     |
| NPV (95% CI)               | 85.5% (74.2-93.1%)                                   | 69.4% (54.6-81.7%)                       | -                                     |
| Accuracy (95% CI)          | 69.9% (62.9-76.3%)                                   | 77.5% (71.2-83%)                         | -                                     |

606 Abbreviation: CI, confidence interval; PPV, positive predictive value; NPV, negative predictive value.

607  
 608 **Table 2. Evaluating the Joint Model Performances in the Training and Validation Cohorts.**

|                            | <b>Training cohort<br/>(5-fold cross-validation)</b> | <b>Prospective validation cohort</b> |
|----------------------------|------------------------------------------------------|--------------------------------------|
| Breast cancer patients (n) | 91                                                   | 143                                  |
| Benign nodule patients (n) | 102                                                  | 66                                   |

|                      |                    |                    |
|----------------------|--------------------|--------------------|
| Sensitivity (95% CI) | 90.1% (82.1-95.4%) | 90.2% (84.1-94.5%) |
| Specificity (95% CI) | 85.3% (76.9-91.5%) | 80.3% (68.7-89.1%) |
| PPV (95% CI)         | 84.5% (75.8-91.1%) | 90.8% (84.9-95.0%) |
| NPV (95% CI)         | 90.6% (82.9-95.6%) | 79.1% (67.4-88.1%) |
| Accuracy (95% CI)    | 87.6% (82.1-91.9%) | 87.1% (81.8-91.3%) |

609 Abbreviation: CI, confidence interval; PPV, positive predictive value; NPV, negative predictive value.

610

611

## 612 **Supplemental material**

### 613 **File S1. Supplementary methods**

614

#### 615 **Figure S1. Multi-omic Cell-free DNA Profiles of Breast Cancer Patients, and Subjects with** 616 **Benign Nodule.**

617 **A.** Frequencies of chromosome arm-level copy number variations (CNVs) in subjects with breast  
618 cancers and benign nodules. Amplifications are represented in red, while losses are depicted in blue.

619 **B.** Fragment size distribution (FSD) in chromosome 18p across various groups. The distribution  
620 illustrates the fragment size profiles among subjects with benign nodules and breast cancers. **C.** Ratio  
621 of short (100-150bp) fragments to long (150-220bp) fragments across all 5Mb bins on chromosomal  
622 arms in subjects with breast cancers and benign nodules. Abbreviation: CNV, copy number variation;  
623 BC, breast cancer; BN, benign nodule.

#### 624 **Figure S2. The ichorCNA Tumor Fraction Distribution of Breast Cancer and Benign Nodule in** 625 **the Training Cohort and the Validation Cohort.**

626 We used the ichorCNA reported tumor fraction (TF) to show the differences in CNV profile between  
627 breast cancer (BC) patients and benign nodule (BN) patients. The TF by ichorCNA was significantly  
628 higher for the BC patients compared to the BN patients in both the training cohort ( $P = 8 \times 10^{-5}$ ) and  
629 the validation cohort ( $P = 0.029$ ). This suggests that while the BC and BN groups both vary  
630 substantially from health baselines, there are still distinguishable differences between the two groups.  
631 Abbreviation: TF, tumor fraction; CNV, copy number variation; BC, breast cancer; BN, benign  
632 nodule.

#### 633 **Figure S3. The Area Under the Curve Distribution of Base Learners in the Training Cohort.**

634 A total of 24 ( $3 \times 8$ ) top base learners were selected to create the final cfFrag score by the 5-fold  
635 cross-validation AUC in the training cohort. Abbreviation: AUC, area under the curve.

#### 636 **Figure S4. ROC Curves for Selected Base Learners in the Training Cohort.**

637 Among the three feature types, CNV showed the highest mean AUC of 0.742 [0.661 – 0.791] for its  
638 top 8 base learners, while the FSD and FSR showed similar predict power in mean AUC (0.706  
639 [0.631-0.750] and 0.706 [0.647-0.754] ), as shown in Table S3. Abbreviation: CNV, copy number  
640 variation; AUC, area under the curve; FSD, fragment size distribution; FSR, fragment size ratio.

#### 641 **Figure S5. Feature Recursive Feature Elimination Analysis in the Training Cohort and the** 642 **Validation Cohort.**

643 The cfFrag model showed possible overfitting in the training cohort using only subsets of  
644 top-performing features in the final model. The 5-fold cross-validation AUCs in the training cohort  
645 showed a gradual decrease as more features were used in the model construction process.  
646 Abbreviation: AUC, area under the curve.

647 **Figure S6. The cfFrag Score Distribution in the Training Cohort (5-fold cross-validation).**

648 **Figure S7. ROC Curve of the cfFrag Model in Subsets of Age-matched Patients and Patients  
649 with Small Nodule ( $\leq 1\text{cm}$ ) in the Training and Validation Cohorts.**

650 **A.** Receiver operating characteristic (ROC) curves of the cfFrag model using an age-matched subset  
651 in the training cohort (5-fold cross-validation) and the independent validation cohort. **B.** ROC curves  
652 of the cfFrag model using an age-matched subset in the training cohort (5-fold cross-validation) and  
653 the independent validation cohort. The shadow areas indicate the 95% confidence intervals (CI).  
654 Abbreviation: ROC, receiver operating characteristic; AUC, area under the curve; CI, confidence  
655 interval.

656 **Figure S8. ROC Curves for Traditional Imaging Technique in Different Cohorts.**

657 Abbreviation: BI-RADS, Breast Imaging Reporting and Data System; ROC, receiver operating  
658 characteristic; AUC, area under the curve.

659 **Figure S9. Performance Evaluation for Fragmentomics Model in Different Subgroups of Breast  
660 Cancer Patients in the Validation Cohort.**

661 Abbreviation: HR, hormone receptor; HER2, human epidermal growth factor receptor 2; TNBC,  
662 triple-negative breast cancer; BI-RADS, Breast Imaging Reporting and Data System.

663 **Figure S10. Performance Evaluation for Fragmentomics Model in Different Subgroups of  
664 Patients with Benign Nodule in the Validation Cohort.**

665 Abbreviation: BI-RADS, Breast Imaging Reporting and Data System.

666 **Figure S11. Bootstrapped (100 times) Performance Evaluation of Fragmentomics Model in  
667 Breast Cancer Subgroups in the Validation Cohort.**

668 The sensitivities derived from 100 bootstrap iterations for various breast cancer subgroups displayed  
669 patterns similar to our observations in Figure S5. Abbreviation: HR, hormone receptor; HER2, human  
670 epidermal growth factor receptor 2; TNBC, triple-negative breast cancer.

671 **Figure S12. Bootstrapped (100 times) Performance Evaluation of Fragmentomics Model in  
672 Benign Nodule Subgroups in the Validation Cohort.**

673 The specificities for the BN subgroup, assessed through 100 bootstrap iterations, align with the trends

674 seen in the validation cohort (Figure S6).

675 **Figure S13. The cfFrag Score Distribution of Different Subgroups in the Validation Cohort (HR,**  
676 **HER2, and TNBC).**

677 Abbreviation: NS, no significance; HR, hormone receptor; HER2, human epidermal growth factor  
678 receptor 2; TNBC, triple-negative breast cancer.

679 **Figure S14. The Feature Correlation of Inter- and Intra-run Samples.**

680 No significant differences were observed between the technical replicates and the two batches in all  
681 three fragmentomics profiles, including copy number variation (A), fragment size distribution (B),  
682 and fragment size ratio (C). Abbreviation: CNV, copy number variation; FSD, fragment size  
683 distribution; FSR, fragment size ratio.

684 **Figure S15. Comparing the Joint Model against the Fragmentomics Model, Mammography,**  
685 **and Ultrasound.**

686 ROC curves for the training cohort (A; 5-fold cross-validation) and the prospective validation cohort  
687 (B). The Wilcoxon  $P$  values compare the joint model against each individual technique. Abbreviation:  
688 AUC, area under the curve.

689

690 **Table S1. Patient Characteristics.**

691 **Table S2. Selected top-performing base learners for constructing the final cfFrag model.**

692 **Table S3. CNV features ranked by their importance.**

693 **Table S4. FSR features ranked by their importance.**

694 **Table S5. FSD features ranked by their importance.**

695 **Table S6. Evaluating the Fragmentomics Model Performances at 85% Sensitivity Cutoff.**
