# Supplementary material for: Cell-free DNA Fragmentomics Assay to Discriminate the Malignancy of Breast Nodules and Evaluate Treatment Response
Source: bioRxiv or medRxiv preprint supplement (doi:10.1101/2024.10.15.24315518), 2024-10-17

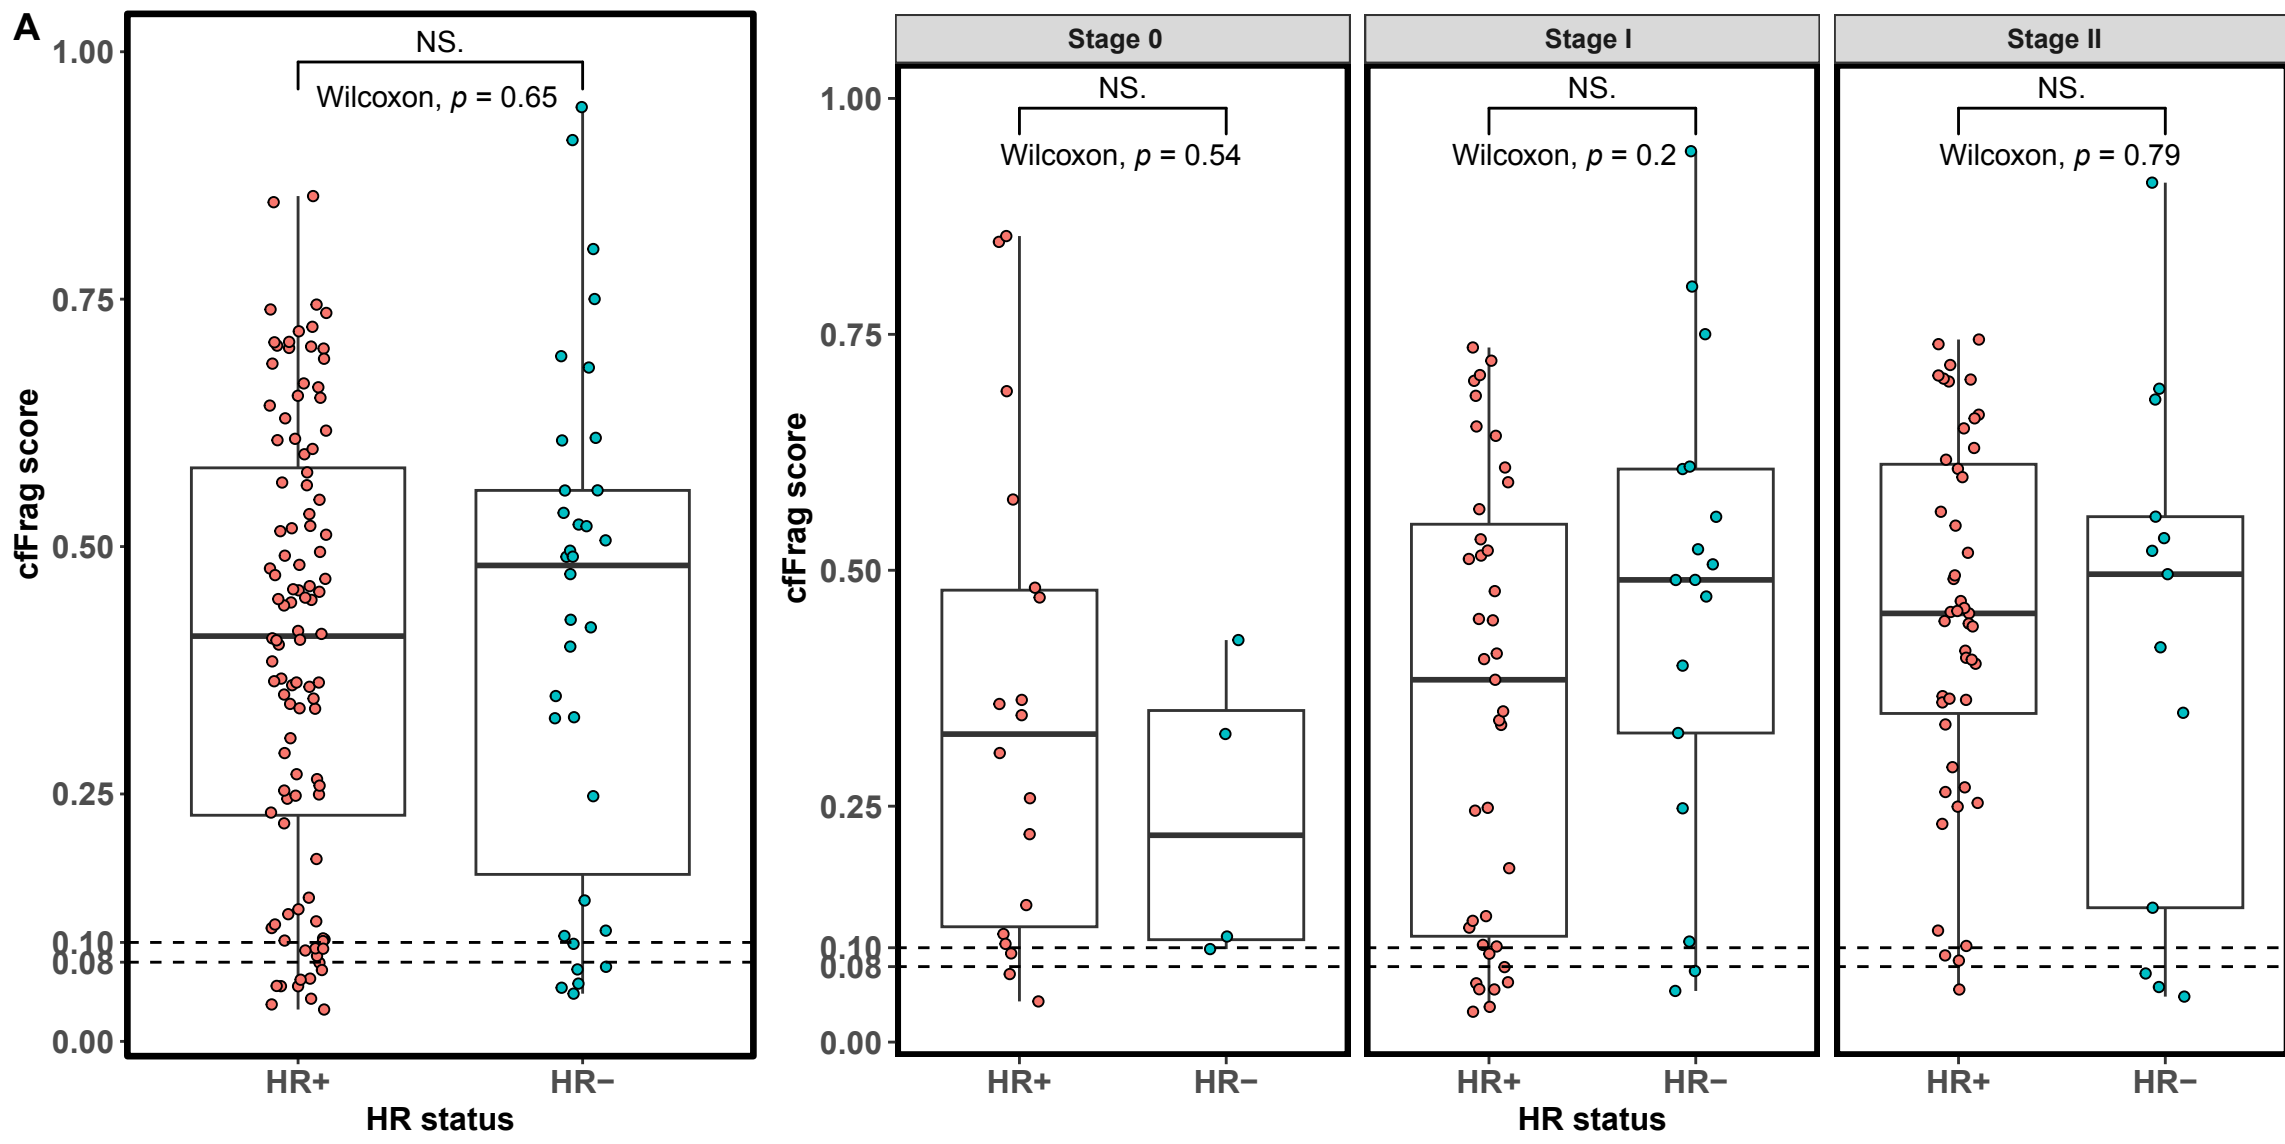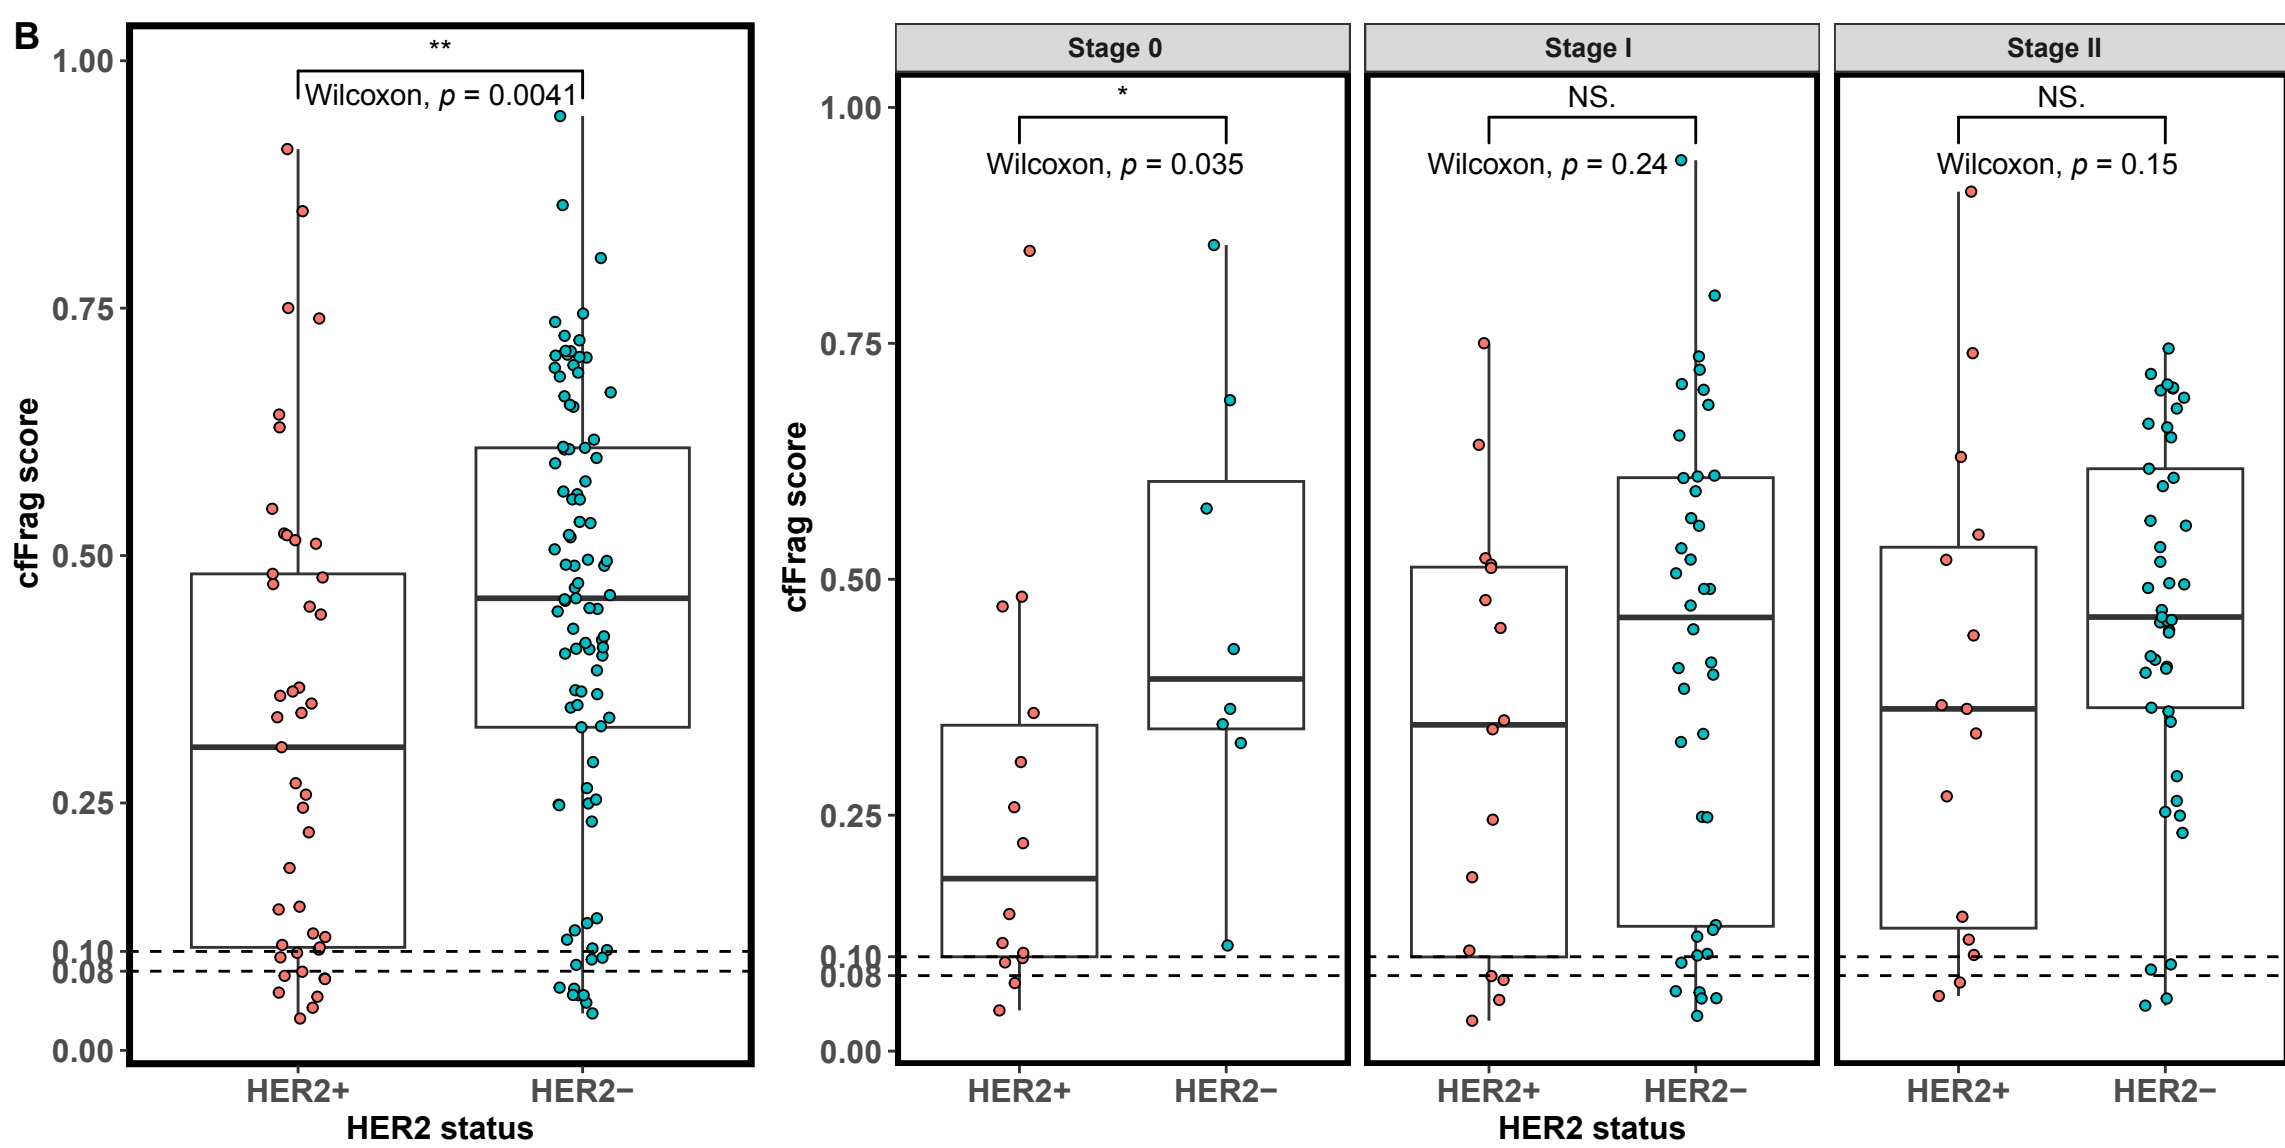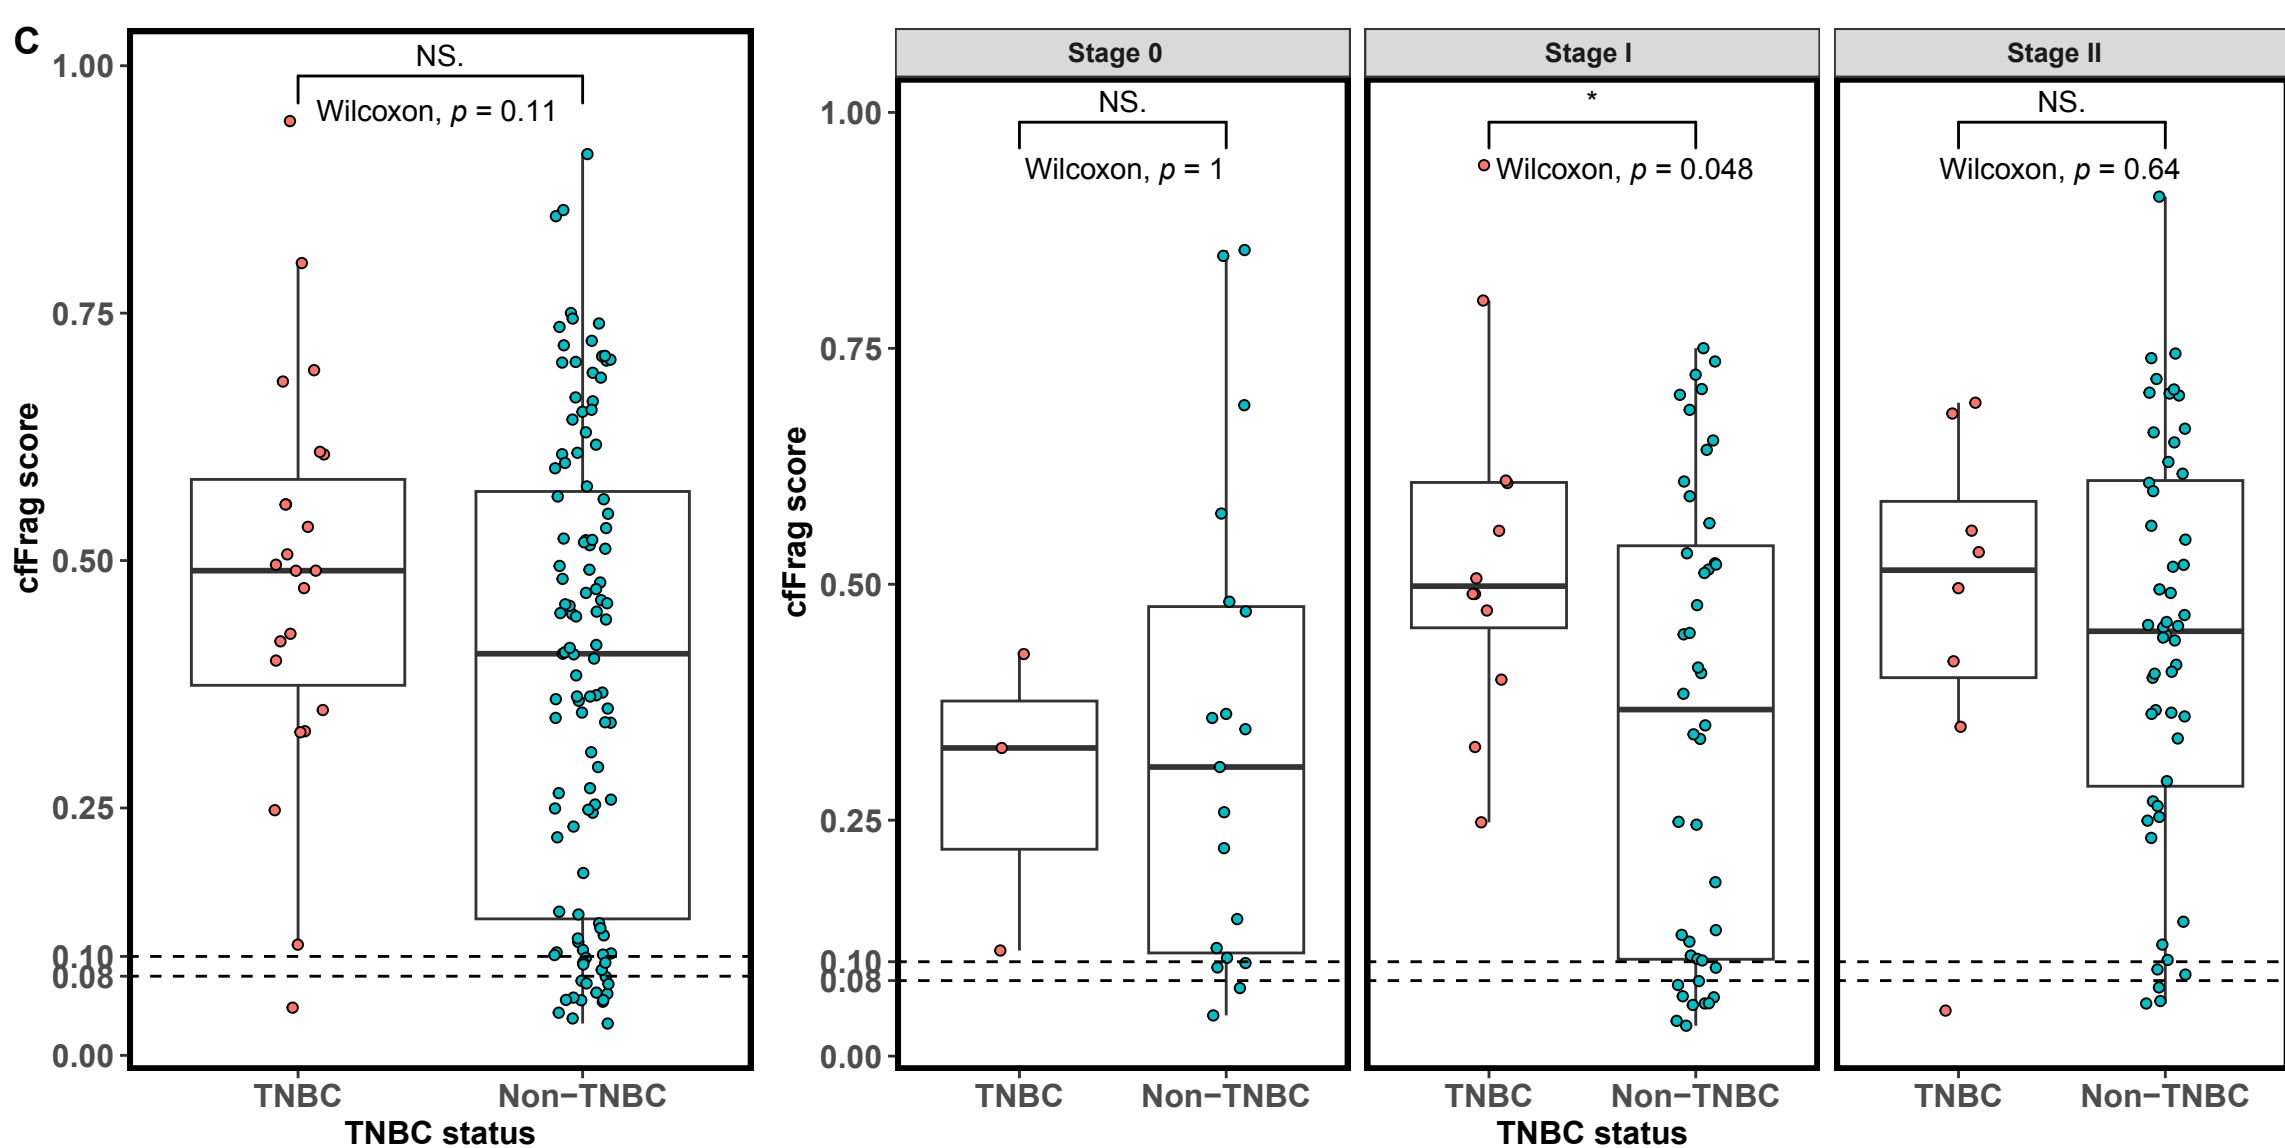

Supplement: Supplementary file [file media-14.pdf]
