# Supplementary material for: Cell-free DNA Fragmentomics Assay to Discriminate the Malignancy of Breast Nodules and Evaluate Treatment Response
Source: bioRxiv or medRxiv preprint supplement (doi:10.1101/2024.10.15.24315518), 2024-10-17

**A****CNV correlation(Pearson) heatmap**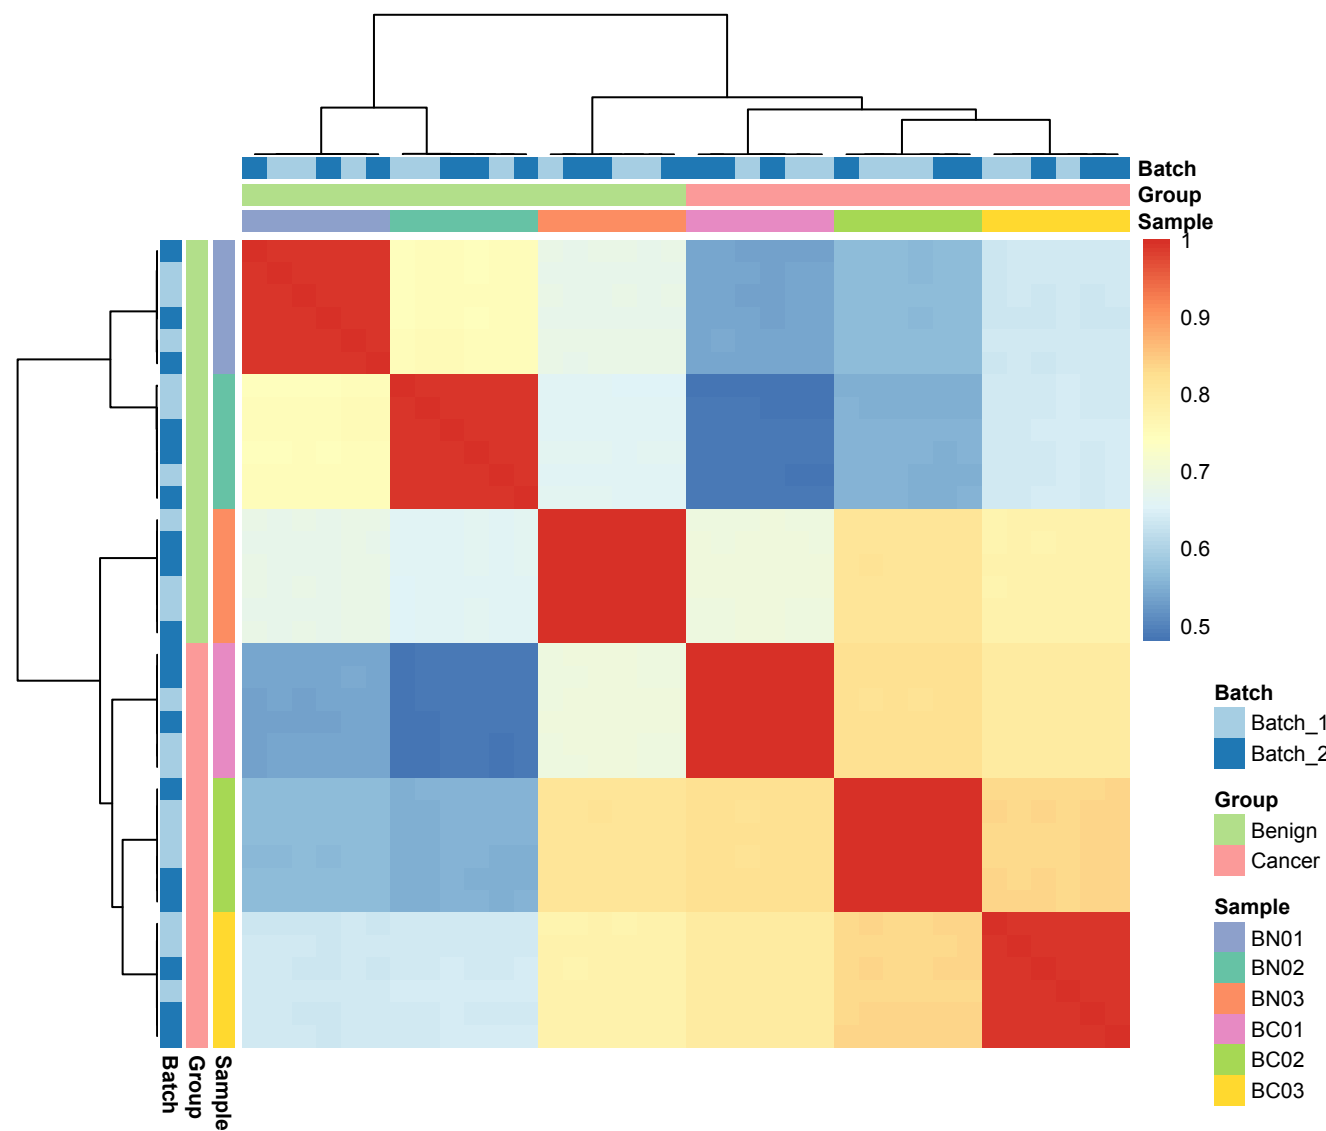**B****FSD correlation(Pearson) heatmap**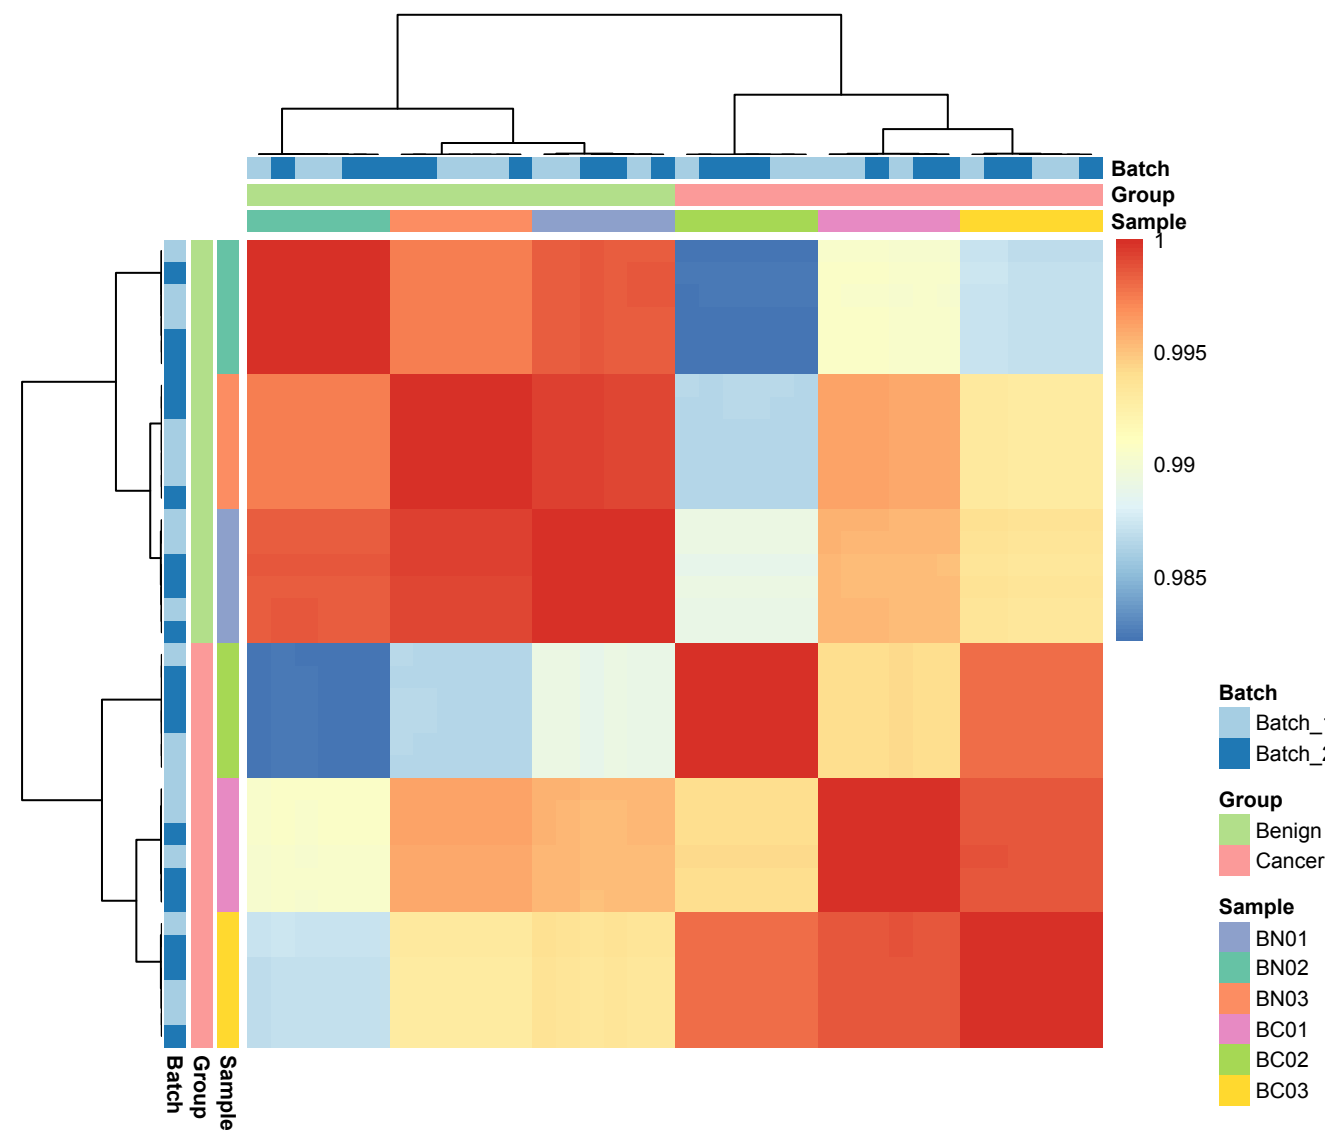**C****FSR correlation(Pearson) heatmap**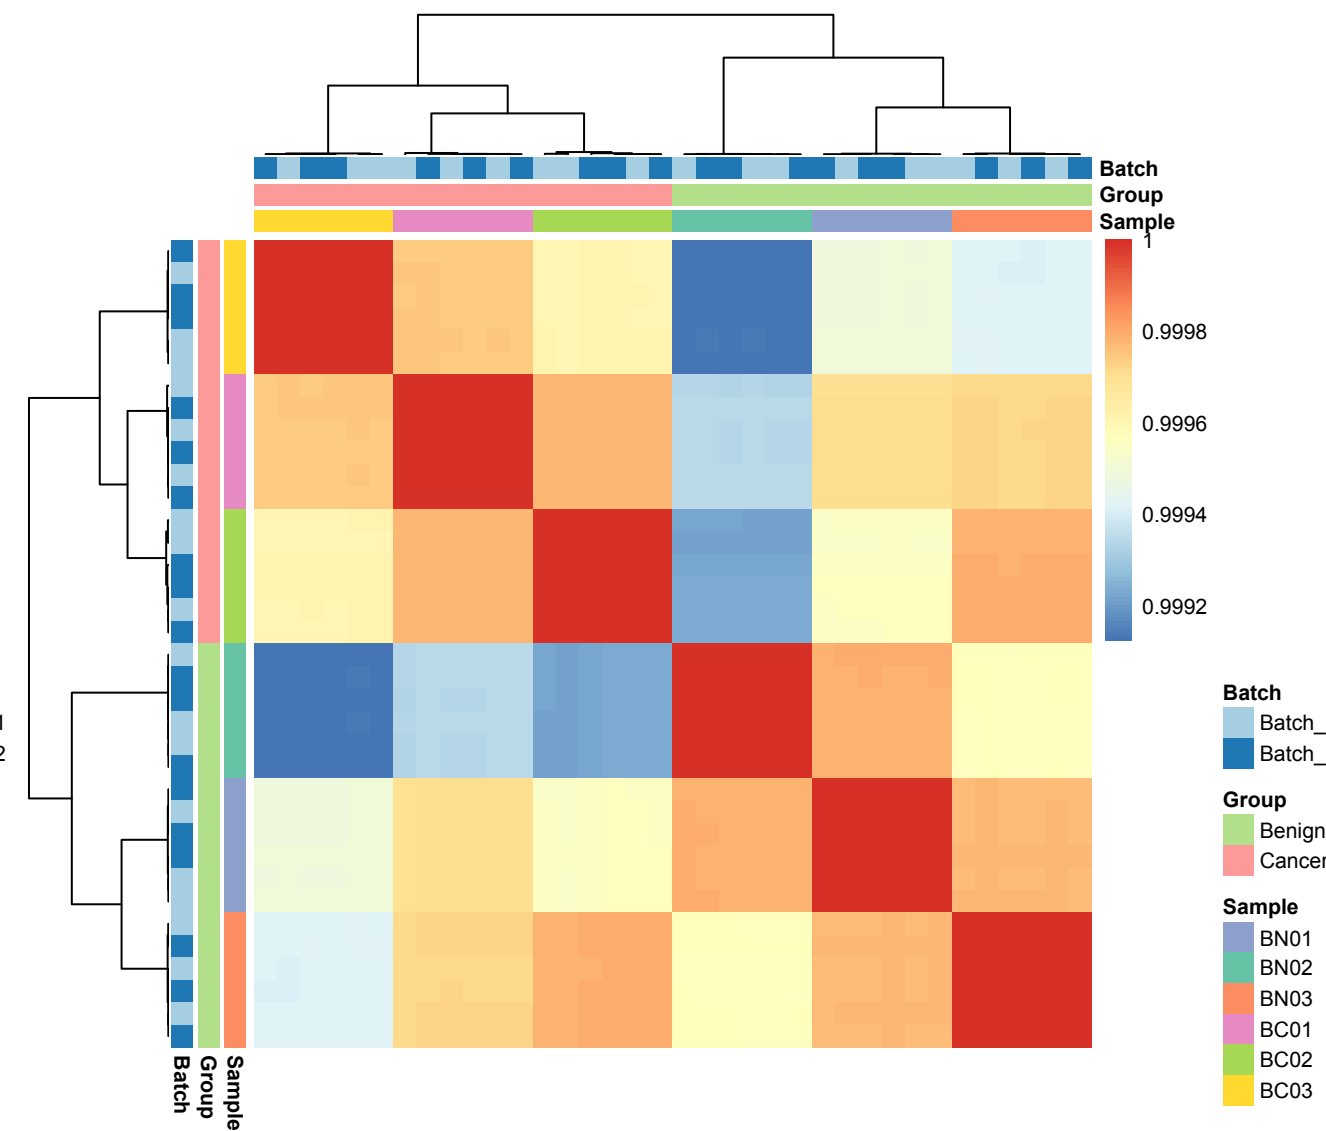

Supplement: Supplementary file [file media-15.pdf]
